# Supplementary material for: An efficient and straightforward approach for accessing thionoesters via palladium-catalyzed C–N cleavage of thioamides
Source: Royal Society of Chemistry journal article supplement (doi:10.1039/d1ob02349g), 2022-01-01

# Supporting Information

## An Efficient and Straightforward Approach for Accessing Thionoester via Palladium-Catalyzed C-N Cleavage of Thioamides

Yinbo Liu,<sup>a</sup> Xiaofeng Mo,<sup>a</sup> Majeed Irfan,<sup>a</sup> Mei Zhang,<sup>a</sup> Hui Wang,<sup>a</sup> Zhuo Zeng<sup>ab,\*</sup>

<sup>a</sup> School of Chemistry, South China Normal University, Guangzhou 510006, People's  
Republic of China

Fax:(+86)-20-3931-0187 E-mail: [zhuoz@scun.edu.cn](mailto:zhuoz@scun.edu.cn);

<sup>b</sup> Key Laboratory of Organofluorine Chemistry, Shanghai Institute of Organic  
Chemistry, Chinese Academy of Science, 345 Lingling Road, Shanghai 200032,  
China

### List of Contents

|                                                                                                    |    |
|----------------------------------------------------------------------------------------------------|----|
| Table S1 Referred to from the Main Manuscript.....                                                 | 2  |
| List of Known Compounds .....                                                                      | 3  |
| Experimental Procedures and Characterization Data.....                                             | 3  |
| References.....                                                                                    | 17 |
| Copies of <sup>1</sup> H NMR, <sup>13</sup> C NMR, <sup>19</sup> F NMR, Mass spectra and HRMS..... |    |
| .....                                                                                              | 18 |

## Table S1 Referred to from the Main Manuscript

Table S1 Summary of key optimization studies in the esterification of thioamides<sup>[a]</sup>

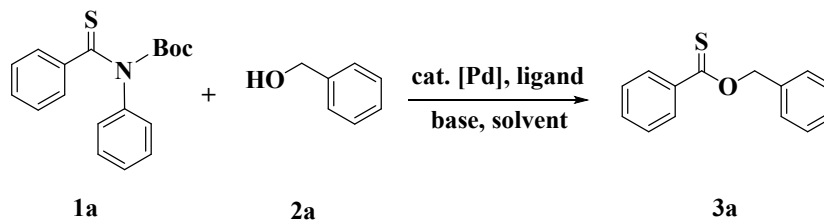

| Entry | Catalyst                                           | Ligand[c]                                      | Base                           | Solvent            | Yield[b] |
|-------|----------------------------------------------------|------------------------------------------------|--------------------------------|--------------------|----------|
| 1     | Pd(PPh <sub>3</sub> ) <sub>2</sub> Cl <sub>2</sub> | none                                           | K <sub>2</sub> CO <sub>3</sub> | toluene            | 24       |
| 2     | Pd(OAc) <sub>2</sub>                               | PPh <sub>3</sub>                               | K <sub>2</sub> CO <sub>3</sub> | toluene            | 52       |
| 3     | Pd <sub>2</sub> (dba) <sub>3</sub>                 | none                                           | K <sub>2</sub> CO <sub>3</sub> | toluene            | <5       |
| 4     | PdCl <sub>2</sub>                                  | PCy <sub>3</sub>                               | K <sub>2</sub> CO <sub>3</sub> | toluene            | <5       |
| 5     | PdCl <sub>2</sub>                                  | dppp                                           | K <sub>2</sub> CO <sub>3</sub> | toluene            | <5       |
| 6     | PdCl <sub>2</sub>                                  | dppf                                           | K <sub>2</sub> CO <sub>3</sub> | toluene            | trace    |
| 7     | PdCl <sub>2</sub>                                  | Xantphos                                       | K <sub>2</sub> CO <sub>3</sub> | toluene            | trace    |
| 8     | Pd(OAc) <sub>2</sub>                               | PPh <sub>3</sub>                               | K <sub>3</sub> PO <sub>4</sub> | toluene            | 73       |
| 9     | Pd(OAc) <sub>2</sub>                               | PCy <sub>3</sub>                               | K <sub>3</sub> PO <sub>4</sub> | toluene            | 50       |
| 10    | Pd(OAc) <sub>2</sub>                               | P(C <sub>6</sub> F <sub>5</sub> ) <sub>3</sub> | K <sub>3</sub> PO <sub>4</sub> | toluene            | 81       |
| 11    | Pd(OAc) <sub>2</sub>                               | (4-MeOPh) <sub>3</sub> P                       | K <sub>3</sub> PO <sub>4</sub> | toluene            | 28       |
| 12    | Pd(OAc) <sub>2</sub>                               | Rac-Binap                                      | K <sub>3</sub> PO <sub>4</sub> | toluene            | 55       |
| 13    | Pd(OAc) <sub>2</sub>                               | dppp                                           | K <sub>3</sub> PO <sub>4</sub> | toluene            | 25       |
| 14    | Pd(OAc) <sub>2</sub>                               | dppf                                           | K <sub>3</sub> PO <sub>4</sub> | toluene            | <5       |
| 15    | Pd(OAc) <sub>2</sub>                               | P(C <sub>6</sub> F <sub>5</sub> ) <sub>3</sub> | K <sub>3</sub> PO <sub>4</sub> | DMSO               | trace    |
| 16    | Pd(OAc) <sub>2</sub>                               | P(C <sub>6</sub> F <sub>5</sub> ) <sub>3</sub> | K <sub>3</sub> PO <sub>4</sub> | DMF                | trace    |
| 17    | Pd(OAc) <sub>2</sub>                               | P(C <sub>6</sub> F <sub>5</sub> ) <sub>3</sub> | K <sub>3</sub> PO <sub>4</sub> | CH <sub>3</sub> CN | <5       |
| 18[d] | Pd(OAc) <sub>2</sub>                               | P(C <sub>6</sub> F <sub>5</sub> ) <sub>3</sub> | K <sub>3</sub> PO <sub>4</sub> | toluene            | 56       |
| 19[e] | Pd(OAc) <sub>2</sub>                               | P(C <sub>6</sub> F <sub>5</sub> ) <sub>3</sub> | K <sub>3</sub> PO <sub>4</sub> | toluene            | 62       |
| 20[f] | Pd(OAc) <sub>2</sub>                               | P(C <sub>6</sub> F <sub>5</sub> ) <sub>3</sub> | K <sub>3</sub> PO <sub>4</sub> | toluene            | 43       |

[a] Reaction condition: **1a** (0.2 mmol, 1.0 equiv), **2a** (0.3 mmol, 1.5 equiv), catalyst (5 mol%), ligand (20 mol%), base (3.0

equiv), solvent (2.0 ml), 110 ° C, 12h. [b] Isolated yield. [c] Full name of all ligands: PPh<sub>3</sub>(Triphenylphosphine),

PCy<sub>3</sub>(Tricyclohexyl phosphine), dppp (1,3-Bis(diphenylphosphino)propane), dppf (1,1'-Bis(diphenylphosphino)ferrocene), Xantphos(9,9-Dimethyl-4,5-bis(diphenylphosphino)xanthene), P(C<sub>6</sub>F<sub>5</sub>)<sub>3</sub> (Tris(pentafluorophenyl)phosphine), (4-MeOPh)<sub>3</sub>P(Tris(p-methoxyphenyl)phosphine), Rac-Binap(1,1'-Binaphthyl-2,2'-diphemyl phosphine). [d] Pd(OAc)<sub>2</sub> (3 mol%). [e]

P(C<sub>6</sub>F<sub>5</sub>)<sub>3</sub> (10 mol%). [f] At 90 ° C.

## List of Known Compounds

The reactions were conducted in sealed tube under nitrogen atmosphere. All reactants reported in the manuscript are commercially available and have been prepared by the method reported previously. All solvents were purchased at the China suppliers and used without any purification. Flash chromatography was performed using 200-300 mesh silica gel.  $^1\text{H}$  and  $^{13}\text{C}$  and  $^{19}\text{F}$  NMR data were recorded with AVANCE NEO Bruker (600 MHz) and Varian AS (400 MHz) spectrometers in  $\text{CDCl}_3$  or  $(\text{CD}_3)_2\text{SO}_2$  with tetramethylsilane as an internal standard.  $^1\text{H}$  NMR data are given for all compounds in the Supporting Experimental.  $^1\text{H}$  NMR,  $^{13}\text{C}$  NMR,  $^{19}\text{F}$  NMR and HRMS data are reported for all new compounds.

## Experimental Procedures and Characterization Data

Experimental procedures for the synthesis of *N*-phenylbenzothioamides.

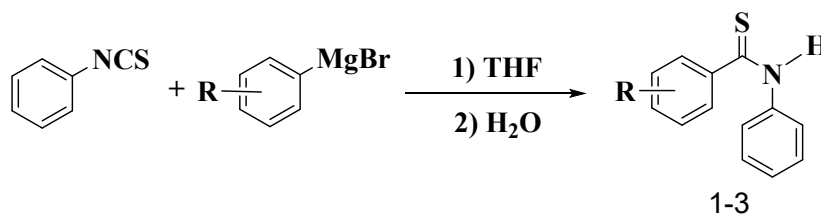

To a solution of phenylisothiocyanate (10.0 mmol, 1.0 equiv) in dry THF (5 mL) was added dropwise a dry THF solution of Grignard reagent (10.0 mmol, 1.0 equiv) at 0 °C. The reaction mixture was left to warm up to room temperature, and stirred for another 2 h. The reaction was quenched with water (10 mL), extracted with dichloromethane (3 x 20 mL). The combined organic solution was washed with brine and dried over anhydrous  $\text{Na}_2\text{SO}_4$ . The solvent was evaporated under reduced pressure, and the residue was purified by flash column chromatography (petroleum ether/ethyl acetate) to give the desired compound.

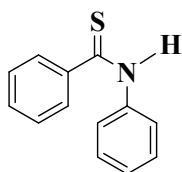

**N-phenylbenzothioamide (1).** The representative general procedure mentioned above was followed. Purification by flash column chromatography (petroleum ether/ethyl acetate =10/1) yielded the target compound **1** in 74% (1.58 g) as a yellow solid;  $R_f$  = 0.52 (petroleum ether/ethyl acetate = 5/1);  $^1\text{H NMR}$  (600 MHz,  $\text{DMSO-}d_6$ )  $\delta$  11.75 (s, 1H), 7.83 (d,  $J$  = 7.8 Hz, 4H), 7.53 (t,  $J$  = 7.3 Hz, 1H), 7.49 – 7.42 (m, 4H), 7.28 (t,  $J$  = 7.4 Hz, 1H). These data are corresponding to the literature.<sup>[1]</sup>

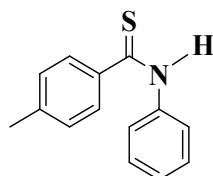

**4-methyl-N-phenylbenzothioamide (2).** The representative general procedure mentioned above was followed. Purification by flash column chromatography (petroleum ether/ethyl acetate =10/1) yielded the target compound **2** in 76% (1.72 g) as a yellow solid;  $R_f$  = 0.61 (petroleum ether/ethyl acetate = 5/1);  $^1\text{H NMR}$  (600 MHz,  $\text{DMSO-}d_6$ )  $\delta$  11.63 (s, 1H), 7.78 (dd,  $J$  = 14.0 Hz,  $J$  = 7.9 Hz, 4H), 7.43 (t,  $J$  = 7.9 Hz, 2H), 7.27 (t,  $J$  = 7.7 Hz, 3H), 2.37 (s, 3H). These data are corresponding to the literature.<sup>[2]</sup>

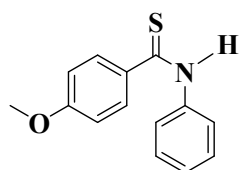

**4-methoxy-N-phenylbenzothioamide (3).** The representative general procedure mentioned above was followed. Purification by flash column chromatography (petroleum ether/ethyl acetate =10/1) yielded the target compound **3** in 81% (1.97 g) as a yellow solid;  $R_f$  = 0.35 (petroleum ether/ethyl acetate = 5/1);  $^1\text{H NMR}$  (600 MHz,  $\text{DMSO-}d_6$ )  $\delta$  11.54 (s, 1H), 7.90 (d,  $J$  = 8.6 Hz, 2H), 7.77 (d,  $J$  = 7.8 Hz, 2H), 7.43 (t,

$J = 7.7$  Hz, 2H), 7.27 (t,  $J = 7.3$  Hz, 1H), 7.02 (d,  $J = 8.7$  Hz, 2H), 3.84 (s, 3H).

These data are corresponding to the literature.<sup>[3]</sup>

### Experimental procedures for the synthesis of tert-butyl phenyl(phenylcarbonothioyl)carbamates.

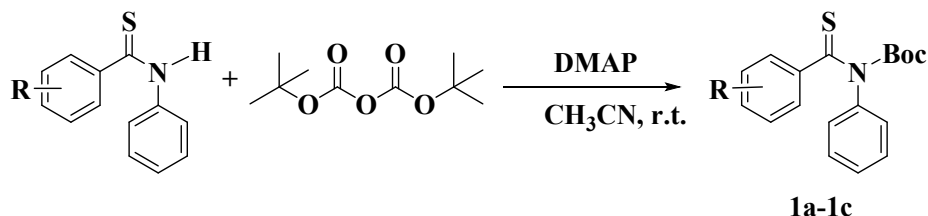

An oven-dried round-bottomed flask equipped with a stir bar was charged with a *N*-phenylbenzothioamides substrate (5.0 mmol, 1.0 equiv), 4-(dimethylamino)pyridine (1.0 mmol, 0.2 equiv), di-tert-butyl dicarbonate (15.0 mmol, 3.0 equiv) and acetonitrile (10.0 mL). The mixture was allowed to stir at room temperature for 15 h. After the indicated time, the reaction was quenched with aqueous HCl (1.0 M, 25 mL) and extracted with CH<sub>2</sub>Cl<sub>2</sub> (3 x 20 mL). The combined organic layers were dried over anhydrous Na<sub>2</sub>SO<sub>4</sub> and concentrated. Purification by flash column chromatography (petroleum ether/ethyl acetate) afforded pure products.

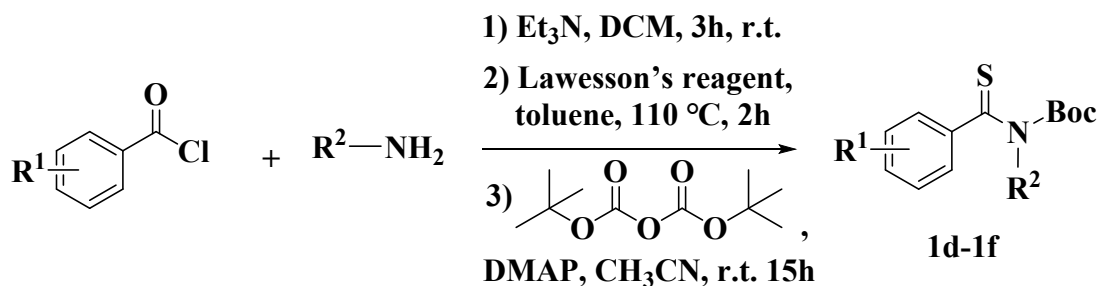

To a mixture of the aniline (5 mmol), Et<sub>3</sub>N (6.5 mmol) and CH<sub>2</sub>Cl<sub>2</sub> (10 mL) was added benzoyl chloride (5.5 mmol) slowly at room temperature for 3 h. Then, the reaction mixture was washed with water and extracted with CH<sub>2</sub>Cl<sub>2</sub> (20 mL × 2). The organic layers were combined, dried over Na<sub>2</sub>SO<sub>4</sub>, and concentrated under reduced pressure to obtain pure benzamide. The solution of the benzamide (2.5 mmol) and Lawesson's reagent (1.5 mmol) in dry toluene (40 mL) was heated at reflux under an atmosphere of nitrogen for 2 h, after which it was concentrated, recrystallized from hexane/ethyl acetate.

An oven-dried round-bottomed flask equipped with a stir bar was charged with a N-phenylbenzothioamides substrate (5.0 mmol, 1.0 equiv), 4-(dimethylamino)pyridine (1.0 mmol, 0.2 equiv), di-tert-butyl dicarbonate (15.0 mmol, 3.0 equiv) and acetonitrile (10.0 mL). The mixture was allowed to stir at room temperature for 15 h. After the indicated time, the reaction was quenched with aqueous HCl (1.0 M, 25 mL) and extracted with CH<sub>2</sub>Cl<sub>2</sub> (3 x 20 mL). The combined organic layers were dried over anhydrous Na<sub>2</sub>SO<sub>4</sub> and concentrated. Purification by flash column chromatography (petroleum ether/ethyl acetate) afforded pure products.

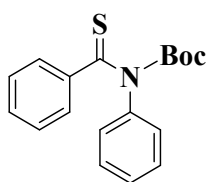

**tert-butyl phenyl(phenylcarbonothioyl)carbamate (1a)**. The representative general procedure mentioned above was followed. Purification by flash column chromatography (petroleum ether/ethyl acetate =20/1) yielded the target compound **1a** in 60% (0.94 g) as an orange-yellow solid;  $R_f=0.68$  (petroleum ether/ethyl acetate = 5/1); <sup>1</sup>H NMR (600 MHz, CDCl<sub>3</sub>)  $\delta$  7.68 (d,  $J = 7.2$  Hz, 2H), 7.46 (t,  $J = 7.8$  Hz, 3H), 7.37 (t,  $J = 7.8$  Hz, 3H), 7.30 (d,  $J = 7.4$  Hz, 2H), 1.19 (s, 9H). <sup>13</sup>C NMR (150 MHz, CDCl<sub>3</sub>)  $\delta$  211.11, 152.69, 146.50, 144.05, 130.91, 129.62, 128.30, 128.22, 128.02, 127.05, 84.59, 27.40. HRMS (ESI-MS)  $m/z$ :  $[M+Na]^+$  Calcd for C<sub>18</sub>H<sub>19</sub>O<sub>2</sub>NNaS 336.1034; Found 336.1029 for the compounds: **1a**.

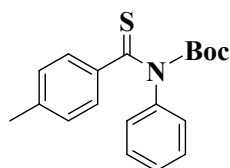

**tert-butyl (4-methylphenylcarbonothioyl)(phenyl)carbamate (1b)**. The representative general procedure mentioned above was followed. Purification by flash column chromatography (petroleum ether/ethyl acetate =20/1) yielded the target compound **1b** in 65% (1.06 g) as an orange-red solid;  $R_f=0.72$  (petroleum ether/ethyl acetate = 5/1); <sup>1</sup>H NMR (600 MHz, CDCl<sub>3</sub>)  $\delta$  7.72 (d,  $J = 8.8$  Hz, 2H), 7.43 (t,  $J = 7.8$  Hz, 2H), 7.34 (t,  $J = 7.4$  Hz, 1H), 7.29 – 7.25 (m, 2H), 6.87 (d,  $J = 8.8$  Hz, 2H), 3.86

(s, 3H), 1.25 (s, 9H).  $^{13}\text{C}$  NMR (150 MHz,  $\text{CDCl}_3$ )  $\delta$  210.24, 162.49, 152.88, 144.23, 139.28, 129.49, 129.36, 127.84, 127.79, 113.43, 83.99, 55.58, 27.45. HRMS (ESI-MS)  $m/z$ :  $[\text{M}+\text{Na}]^+$  Calcd for  $\text{C}_{19}\text{H}_{21}\text{O}_2\text{NNaS}$  350.1191; Found 350.1372 for the compounds: **1b**.

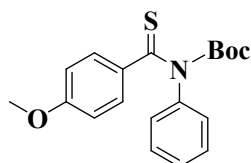

**tert-butyl (4-methoxyphenylcarbonothioyl)(phenyl)carbamate (1c).** The representative general procedure mentioned above was followed. Purification by flash column chromatography (petroleum ether/ethyl acetate =10/1) yielded the target compound **1c** in 58% (0.99 g) as an orange-yellow solid;  $R_f$  =0.43 (petroleum ether/ethyl acetate = 5/1);  $^1\text{H}$  NMR (600 MHz,  $\text{CDCl}_3$ )  $\delta$  7.72 (d,  $J$  = 6.8 Hz, 2H), 7.42 (t,  $J$  = 7.8 Hz, 2H), 7.34 (t,  $J$  = 7.4 Hz, 1H), 7.29 – 7.24 (m, 2H), 6.87 (d,  $J$  = 8.8 Hz, 2H), 3.85 (s, 3H), 1.25 (s, 9H).  $^{13}\text{C}$  NMR (150 MHz,  $\text{CDCl}_3$ )  $\delta$  210.24, 162.26, 152.88, 144.29, 139.28, 129.50, 129.36, 127.85, 127.79, 113.44, 83.99, 55.59, 27.46. HRMS (ESI-MS)  $m/z$ :  $[\text{M}+\text{Na}]^+$  Calcd for  $\text{C}_{19}\text{H}_{21}\text{O}_3\text{NNaS}$  336.1140; Found 336.1146 for the compounds: **1c**.

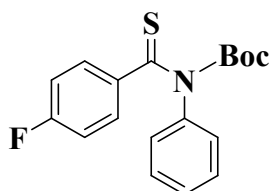

**tert-butyl (4-fluorophenylcarbonothioyl)(phenyl)carbamate (1d).** The representative general procedure mentioned above was followed. Purification by flash column chromatography (petroleum ether/ethyl acetate =30/1) yielded the target compound **1d** in 70% (1.16 g) as an orange-yellow solid;  $R_f$  =0.73 (petroleum ether/ethyl acetate = 5/1);  $^1\text{H}$  NMR (600 MHz,  $\text{CDCl}_3$ )  $\delta$  7.78 – 7.73 (m, 2H), 7.49 (t,  $J$  = 7.7 Hz, 2H), 7.41 (t,  $J$  = 7.4 Hz, 1H), 7.32 (d,  $J$  = 7.5 Hz, 2H), 7.10 (t,  $J$  = 7.6 Hz, 2H), 1.29 (s, 9H).  $^{13}\text{C}$  NMR (150 MHz,  $\text{CDCl}_3$ )  $\delta$  209.25, 164.40 (d,  $J$  = 252.7 Hz), 152.54, 143.90, 142.55 (d,  $J$  = 3.1 Hz), 129.53, 129.26 (d,  $J$  = 8.6 Hz), 128.15, 127.86, 115.24 (d,  $J$  = 21.9 Hz), 84.57, 27.42.  $^{19}\text{F}$  NMR (565 MHz,  $\text{CDCl}_3$ )  $\delta$  -108.65. HRMS

(ESI-MS)  $m/z$ :  $[M+H]^+$  Calcd for  $C_{18}H_{19}O_2NS$  332.1121; Found 332.1125 for the compounds: **1d**.

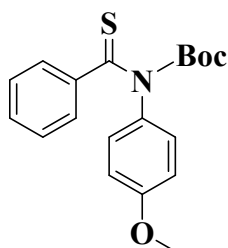

**tert-butyl (4-methoxyphenyl)(phenylcarbonothioyl)carbamate (1e).** The representative general procedure mentioned above was followed. Purification by flash column chromatography (petroleum ether/ethyl acetate =10/1) yielded the target compound **1e** in 86% (1.47 g) as an orange-red solid;  $R_f=0.45$  (petroleum ether/ethyl acetate = 5/1);  $^1H$  NMR (600 MHz,  $CDCl_3$ )  $\delta$  7.66 (d,  $J = 5.2$  Hz, 2H), 7.45 (t,  $J = 7.4$  Hz, 1H), 7.36 (t,  $J = 7.7$  Hz, 2H), 7.21 (d,  $J = 8.9$  Hz, 2H), 6.96 (d,  $J = 6.7$  Hz, 2H), 3.83 (s, 3H), 1.18 (s, 9H).  $^{13}C$  NMR (150 MHz,  $CDCl_3$ )  $\delta$  211.03, 159.10, 152.76, 146.41, 136.74, 130.68, 128.92, 128.16, 126.88, 114.72, 84.41, 55.45, 27.29. HRMS (ESI-MS)  $m/z$ :  $[M+H]^+$  Calcd for  $C_{19}H_{22}O_3NS$  344.1320; Found 344.1323 for the compounds: **1e**.

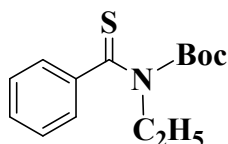

**tert-butyl ethyl(phenylcarbonothioyl)carbamate (1f).** The representative general procedure mentioned above was followed. Purification by flash column chromatography (petroleum ether/ethyl acetate =30/1) yielded the target compound **1f** in 88% (1.16g) as an orange-yellow solid;  $R_f=0.76$  (petroleum ether/ethyl acetate = 5/1);  $^1H$  NMR (600 MHz,  $CDCl_3$ )  $\delta$  7.39 (d,  $J = 7.0$  Hz, 2H), 7.32 (t,  $J = 7.4$  Hz, 1H), 7.24 (t,  $J = 7.6$  Hz, 2H), 4.33 (q,  $J = 7.0$  Hz, 2H), 1.32 (t,  $J = 7.1$  Hz, 3H), 1.10 (s, 9H).  $^{13}C$  NMR (150 MHz,  $CDCl_3$ )  $\delta$  209.05, 152.34, 147.21, 129.86, 127.87, 126.37, 83.76, 47.79, 27.15, 12.73. HRMS (ESI-MS)  $m/z$ :  $[M+H]^+$  Calcd for  $C_{14}H_{20}O_2NS$  266.1215; Found 266.1219 for the compounds: **1f**.



**Experimental procedures for the synthesis of tert-butyl (tert-butoxycarbonyl)(phenylcarbonothioyl)carbamate.**

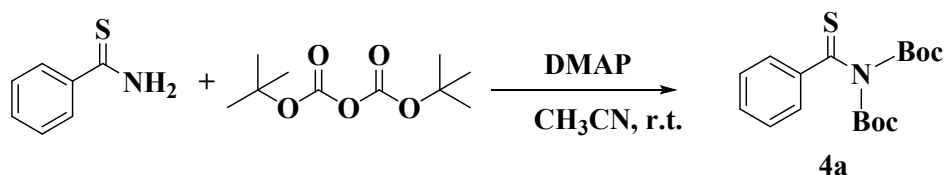

An oven-dried round-bottomed flask equipped with a stir bar was charged with a benzothioamide substrate (5.0 mmol, 1.0 equiv), 4-(dimethylamino)pyridine (1.0 mmol, 0.2 equiv), di-tert-butyl dicarbonate (15.0 mmol, 3.0 equiv) and acetonitrile (10.0 mL). The mixture was allowed to stir at room temperature for 15 h. After the indicated time, the reaction was quenched with aqueous HCl (1.0 M, 25 mL) and extracted with CH<sub>2</sub>Cl<sub>2</sub> (3 x 20 mL). The combined organic layers were dried over anhydrous Na<sub>2</sub>SO<sub>4</sub> and concentrated. Purification by flash column chromatography (petroleum ether/ethyl acetate) afforded pure product.

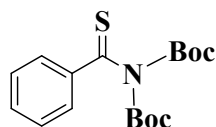

**tert-butyl (tert-butoxycarbonyl)(phenylcarbonothioyl)carbamate (4a).** The representative general procedure mentioned above was followed. Purification by flash column chromatography (petroleum ether/ethyl acetate =20/1) yielded the target compound **4a** in 68% (1.14 g) as a yellow solid;  $R_f$  =0.62 (petroleum ether/ethyl acetate = 5/1); <sup>1</sup>H NMR (600 MHz, CDCl<sub>3</sub>) δ 7.65 (d,  $J$  = 7.2 Hz, 2H), 7.49 (t,  $J$  = 7.4 Hz, 1H), 7.38 (t,  $J$  = 7.8 Hz, 2H), 1.49 (s, 18H). <sup>13</sup>C NMR (150 MHz, CDCl<sub>3</sub>) δ 203.82, 149.30, 142.37, 131.67, 128.22, 127.22, 83.61, 27.96.

**Experimental procedures for the synthesis of thionoester via tert-butyl phenyl(phenylcarbonothioyl)carbamates.**

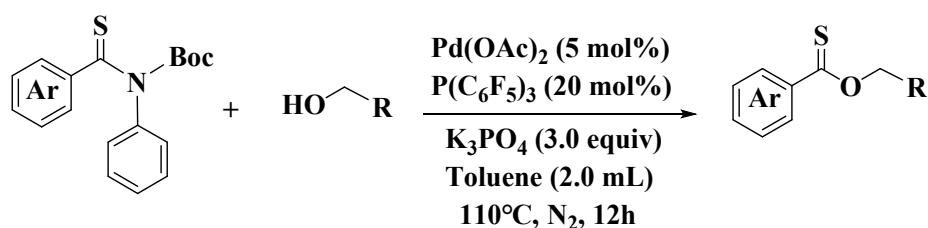

A sealed tube equipped with a stir bar was charged with tert-butyl phenyl(phenylcarbonothioyl)carbamates (0.2 mmol, 1.0 equiv), alcohols (0.3 mmol, 1.5 equiv),  $\text{Pd(OAc)}_2$  (5 mol%),  $\text{P(C}_6\text{F}_5)_3$  (20 mol%),  $\text{K}_3\text{PO}_4$  (3.0 equiv) and toluene (2.0 ml) under a  $\text{N}_2$  atmosphere. The reaction mixture was placed in an oil bath and stirred for 12 h at  $110^\circ\text{C}$ . Then the mixture was cooled to room temperature, washed with  $\text{H}_2\text{O}$  (20 mL), saturated  $\text{NaCl}$  (20 mL) and extracted with  $\text{CH}_2\text{Cl}_2$  (20 mL $\times$ 3). The combined organic phases were dried over anhydrous  $\text{Na}_2\text{SO}_4$ , filtered and concentrated under vacuo. The desired product was isolated by flash column chromatography using 100% petroleum ether as eluent to afford thionoester and calculate the yields. [ $\text{P(C}_6\text{F}_5)_3$  = Tris(pentafluorophenyl)phosphine]

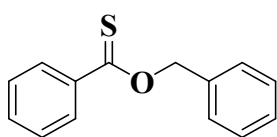

***O*-benzyl benzothioate (3aa).** The representative general procedure mentioned above was followed. Purification by flash column chromatography (100% petroleum ether) yielded the target compound **3aa** in 81% (36.40 mg) as a yellow liquid;  $R_f=0.80$  (100% petroleum ether);  $^1\text{H NMR}$  (600 MHz,  $\text{CDCl}_3$ )  $\delta$  8.21 (d,  $J = 7.3$  Hz, 2H), 7.49 (t,  $J = 7.4$  Hz, 1H), 7.48 (d,  $J = 7.1$  Hz, 2H), 7.42 (t,  $J = 7.3$  Hz, 2H), 7.38 (t,  $J = 7.9$  Hz, 3H), 5.71 (s, 2H). These data are corresponding to the literature.<sup>[4]</sup>

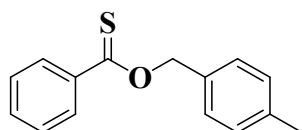

***O*-(4-methylbenzyl) benzothioate (3ab).** The representative general procedure mentioned above was followed. Purification by flash column chromatography (100% petroleum ether) yielded the target compound **3ab** in 74% (35.86 mg) as a yellow liquid;  $R_f=0.86$  (100% petroleum ether);  $^1\text{H NMR}$  (600 MHz,  $\text{CDCl}_3$ )  $\delta$  8.19 (d,  $J =$

7.3 Hz, 2H), 7.52 (t,  $J = 7.4$  Hz, 1H), 7.37 (t,  $J = 6.8$  Hz, 4H), 7.23 (d,  $J = 7.8$  Hz, 2H), 5.66 (s, 2H), 2.39 (s, 3H). These data are corresponding to the literature.<sup>[5]</sup>

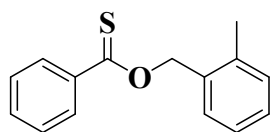

**O-(2-methylbenzyl) benzothioate (3ac).** The representative general procedure mentioned above was followed. Purification by flash column chromatography (100% petroleum ether) yielded the target compound **3ac** in 71% (35.86 mg) as a yellow liquid;  $R_f=0.85$  (100% petroleum ether);  $^1\text{H}$  NMR (600 MHz,  $\text{CDCl}_3$ )  $\delta$  8.22 (dd,  $J = 8.5$  Hz,  $J = 1.2$  Hz, 2H), 7.56 (t,  $J = 6.8$  Hz, 1H), 7.46 (d,  $J = 7.6$  Hz, 1H), 7.42 – 7.38 (m, 2H), 7.36 – 7.31 (m, 1H), 7.30 – 7.25 (m, 2H), 5.73 (s, 2H), 2.43 (s, 3H).  $^{13}\text{C}$  NMR (150 MHz,  $\text{CDCl}_3$ )  $\delta$  211.06, 138.21, 137.45, 133.40, 132.83, 130.52, 129.75, 128.91, 128.87, 128.13, 126.10, 72.91, 19.08. HRMS (EI-MS)  $m/z$ : [M] Calcd for  $\text{C}_{15}\text{H}_{14}\text{OS}$  242.0765; Found 242.0763 for the compounds: **3ac**.

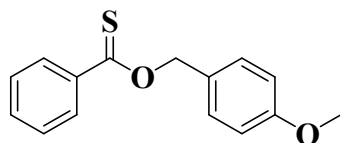

**O-(4-methoxybenzyl) benzothioate (3ad).** The representative general procedure mentioned above was followed. Purification by flash column chromatography (petroleum ether/ethyl acetate = 100/1) yielded the target compound **3ad** in 36% (18.60 mg) as a yellow liquid;  $R_f=0.53$  (petroleum ether/ethyl acetate = 50/1);  $^1\text{H}$  NMR (600 MHz,  $\text{CDCl}_3$ )  $\delta$  8.18 (d,  $J = 8.3$  Hz, 2H), 7.52 (t,  $J = 7.4$  Hz, 1H), 7.41 (d,  $J = 8.6$  Hz, 2H), 7.36 (t,  $J = 7.9$  Hz, 2H), 6.94 (d,  $J = 8.6$  Hz, 2H), 5.64 (s, 2H), 3.84 (s, 3H).  $^{13}\text{C}$  NMR (150 MHz,  $\text{CDCl}_3$ )  $\delta$  211.18, 159.88, 138.34, 132.77, 130.29, 128.89, 128.08, 127.37, 114.06, 74.14, 55.33. HRMS (EI-MS)  $m/z$ : [M] Calcd for  $\text{C}_{15}\text{H}_{14}\text{O}_2\text{S}$  258.0715; Found 258.0705 for the compounds: **3ad**.

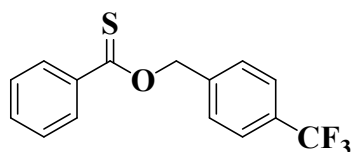

**O-(4-(trifluoromethyl)benzyl) benzothioate (3ae).** The representative general procedure mentioned above was followed. Purification by flash column

chromatography (100% petroleum ether) yielded the target compound **3ae** in 68% (40.29 mg) as a yellow liquid;  $R_f=0.65$  (100% petroleum ether);  $^1\text{H NMR}$  (600 MHz,  $\text{CDCl}_3$ )  $\delta$  8.24 (dd,  $J = 8.5$  Hz,  $J = 1.2$ , 2H), 7.68 (d,  $J = 8.1$  Hz, 2H), 7.65 – 7.56 (m, 3H), 7.44 – 7.42 (m, 2H), 5.71 (s, 2H).  $^{13}\text{C NMR}$  (150 MHz,  $\text{CDCl}_3$ )  $\delta$  210.72, 139.35, 138.01, 133.10, 130.63 (q,  $J = 32.6$  Hz), 128.92, 128.31, 128.24, 125.68 (q,  $J = 3.8$  Hz), 124.00 (q,  $J = 272.0$  Hz), 72.79 (s).  $^{19}\text{F NMR}$  (565 MHz,  $\text{CDCl}_3$ )  $\delta$  -62.64. HRMS (EI-MS)  $m/z$ : [M] Calcd for  $\text{C}_{15}\text{H}_{11}\text{OF}_3\text{S}$  296.0483; Found 296.0483 for the compounds: **3ae**.

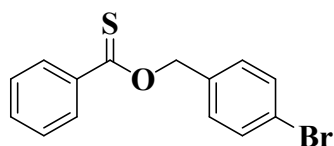

**O-(4-bromobenzyl) benzothioate (3af)**. The representative general procedure mentioned above was followed. Purification by flash column chromatography (100% petroleum ether) yielded the target compound **3af** in 62% (38.09 mg) as a yellow liquid;  $R_f=0.71$  (100% petroleum ether);  $^1\text{H NMR}$  (600 MHz,  $\text{CDCl}_3$ )  $\delta$  8.19 (dd,  $J = 8.5$  Hz,  $J = 1.2$  Hz, 2H), 7.54 (t,  $J = 6.6$  Hz, 3H), 7.41 – 7.33 (m, 4H), 5.66 (s, 2H).  $^{13}\text{C NMR}$  (150 MHz,  $\text{CDCl}_3$ )  $\delta$  210.85, 138.10, 134.34, 132.99, 131.87, 130.04, 128.90, 128.19, 122.57, 73.14. HRMS (EI-MS)  $m/z$ : [M] Calcd for  $\text{C}_{14}\text{H}_{11}\text{OBrS}$  305.9714; Found 305.9715 for the compounds: **3af**.

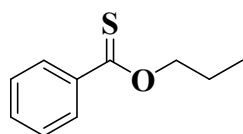

**O-propyl benzothioate (3ag)**. The representative general procedure mentioned above was followed. Purification by flash column chromatography (100% petroleum ether) yielded the target compound **3ag** in 67% (24.15 mg) as a yellow liquid;  $R_f=0.78$  (100% petroleum ether);  $^1\text{H NMR}$  (600 MHz,  $\text{CDCl}_3$ )  $\delta$  8.19 (dd,  $J = 8.5$ ,  $J = 1.2$  Hz, 2H), 7.53 (t,  $J = 7.4$  Hz, 1H), 7.42 – 7.36 (m, 2H), 4.63 (t,  $J = 6.6$  Hz, 2H), 1.99 – 1.91 (m, 2H), 1.10 (t,  $J = 7.4$  Hz, 3H). These data are corresponding to the literature.<sup>[6]</sup>

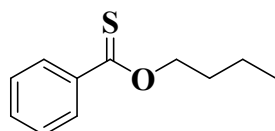

**O-butyl benzothioate (3ah).** The representative general procedure mentioned above was followed. Purification by flash column chromatography (100% petroleum ether) yielded the target compound **3ah** in 70% (27.28 mg) as a yellow liquid;  $R_f=0.76$  (100% petroleum ether);  $^1\text{H NMR}$  (600 MHz,  $\text{CDCl}_3$ )  $\delta$  8.18 (dd,  $J = 8.5$ ,  $J = 1.2$  Hz, 2H), 7.53 (t,  $J = 7.4$  Hz, 1H), 7.41 – 7.37 (m, 2H), 4.68 (t,  $J = 6.5$  Hz, 2H), 1.94 – 1.87 (m, 2H), 1.55 (h,  $J = 7.4$  Hz, 2H), 1.01 (t,  $J = 7.4$  Hz, 3H). These data are corresponding to the literature.<sup>[7]</sup>

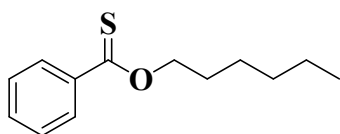

**O-hexyl benzothioate (3ai).** The representative general procedure mentioned above was followed. Purification by flash column chromatography (100% petroleum ether) yielded the target compound **3ai** in 72% (32.02 mg) as a yellow liquid;  $R_f=0.74$  (100% petroleum ether);  $^1\text{H NMR}$  (600 MHz,  $\text{CDCl}_3$ )  $\delta$  8.18 (d,  $J = 8.3$  Hz, 2H), 7.53 (t,  $J = 7.4$  Hz, 1H), 7.38 (t,  $J = 7.8$  Hz, 2H), 4.66 (t,  $J = 6.6$  Hz, 2H), 1.94 – 1.88 (m, 2H), 1.53 – 1.46 (m, 2H), 1.36 (tt,  $J = 13.0$ ,  $J = 6.4$  Hz, 4H), 0.91 (t,  $J = 7.0$  Hz, 3H). These data are corresponding to the literature.<sup>[5]</sup>

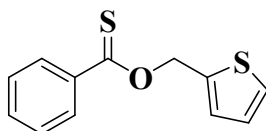

**O-(thiophen-2-ylmethyl) benzothioate (3aj).** The representative general procedure mentioned above was followed. Purification by flash column chromatography (100% petroleum ether) yielded the target compound **3aj** in 58% (27.18 mg) as a yellow liquid;  $R_f=0.63$  (100% petroleum ether);  $^1\text{H NMR}$  (600 MHz,  $\text{CDCl}_3$ )  $\delta$  8.19 (dd,  $J = 8.5$ ,  $J = 1.2$  Hz, 2H), 7.53 (t,  $J = 6.8$  Hz, 1H), 7.37 (t,  $J = 7.5$  Hz, 3H), 7.22 (d,  $J = 3.4$  Hz, 1H), 7.06 – 7.03 (m, 1H), 5.88 (s, 2H).  $^{13}\text{C NMR}$  (150 MHz,  $\text{CDCl}_3$ )  $\delta$  210.63, 138.09, 137.09, 132.94, 128.98, 128.63, 128.13, 127.17, 126.88, 68.31. HRMS (EI-MS)  $m/z$ : [M] Calcd for  $\text{C}_{12}\text{H}_{10}\text{OS}_2$  234.0173; Found 234.0169 for the compounds: **3aj**.

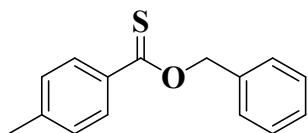

**O-benzyl 4-methylbenzothioate (3ba).** The representative general procedure mentioned above was followed. Purification by flash column chromatography (100% petroleum ether) yielded the target compound **3ba** in 76% (36.83 mg) as a yellow liquid;  $R_f=0.68$  (100% petroleum ether);  $^1\text{H NMR}$  (600 MHz,  $\text{CDCl}_3$ )  $\delta$  8.11 (d,  $J = 8.3$  Hz, 2H), 7.47 (d,  $J = 7.0$  Hz, 2H), 7.41 (t,  $J = 7.3$  Hz, 2H), 7.37 (t,  $J = 7.3$  Hz, 1H), 7.16 (d,  $J = 8.1$  Hz, 2H), 5.69 (s, 2H), 2.37 (s, 3H).  $^{13}\text{C NMR}$  (150 MHz,  $\text{CDCl}_3$ )  $\delta$  211.01, 143.82, 135.90, 135.51, 129.05, 128.87, 128.68, 128.46, 128.36, 73.93, 21.65. HRMS (EI-MS)  $m/z$ : [M] Calcd for  $\text{C}_{15}\text{H}_{14}\text{OS}$  242.0765; Found 242.0761 for the compounds: **3ba**.

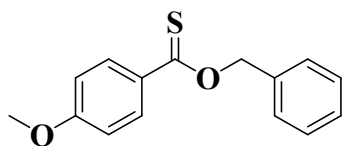

**O-benzyl 4-methoxybenzothioate (3ca).** The representative general procedure mentioned above was followed. Purification by flash column chromatography (petroleum ether/ethyl acetate = 100/1) yielded the target compound **3ca** in 69% (35.65 mg) as a yellow liquid;  $R_f=0.52$  (petroleum ether/ethyl acetate = 50/1);  $^1\text{H NMR}$  (600 MHz,  $\text{CDCl}_3$ )  $\delta$  8.21 (d,  $J = 9.1$  Hz, 2H), 7.47 (d,  $J = 7.2$  Hz, 2H), 7.43 – 7.40 (m, 3H), 6.86 (d,  $J = 9.1$  Hz, 2H), 5.69 (s, 2H), 3.86 (s, 3H).  $^{13}\text{C NMR}$  (150 MHz,  $\text{CDCl}_3$ )  $\delta$  210.11, 163.74, 135.65, 131.21, 128.71, 128.65, 128.40, 128.32, 113.31, 73.74, 55.51. HRMS (EI-MS)  $m/z$ : [M] Calcd for  $\text{C}_{15}\text{H}_{14}\text{O}_2\text{S}$  258.0715; Found 258.0716 for the compounds: **3ca**.

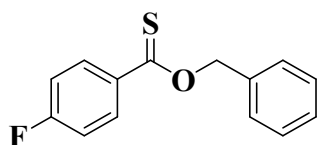

**O-benzyl 4-fluorobenzothioate (3da).** The representative general procedure mentioned above was followed. Purification by flash column chromatography (100% petroleum ether) yielded the target compound **3da** in 87% (42.81 mg) as a yellow liquid;  $R_f=0.74$  (100% petroleum ether);  $^1\text{H NMR}$  (600 MHz,  $\text{CDCl}_3$ )  $\delta$  8.23 (dd,  $J =$

8.9,  $J = 5.5$  Hz, 2H), 7.47 (d,  $J = 7.0$  Hz, 2H), 7.42 (t,  $J = 7.2$  Hz, 2H), 7.38 (t,  $J = 7.0$  Hz, 1H), 7.07 – 7.01 (m, 2H), 5.68 (s, 2H).  $^{19}\text{F}$  NMR (565 MHz,  $\text{CDCl}_3$ )  $\delta$  -106.05.

**Experimental procedures for the synthesis of thionoester via tert-butyl (tert-butoxycarbonyl)(phenylcarbonothioyl)carbamate.**

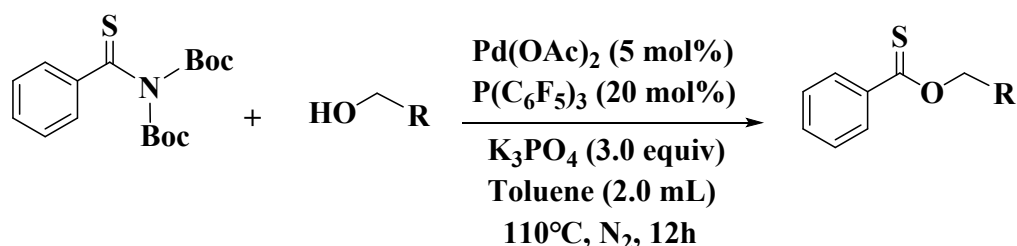

A sealed tube equipped with a stir bar was charged with tert-butyl (tert-butoxycarbonyl)(phenylcarbonothioyl)carbamate (0.2 mmol, 1.0 equiv), alcohols (0.3 mmol, 1.5 equiv),  $\text{Pd}(\text{OAc})_2$  (5 mol%),  $\text{P}(\text{C}_6\text{F}_5)_3$  (20 mol%),  $\text{K}_3\text{PO}_4$  (3.0 equiv) and toluene (2.0 ml) under a  $\text{N}_2$  atmosphere. The reaction mixture was placed in an oil bath and stirred for 12 h at 110 °C. Then the mixture was cooled to room temperature, washed with  $\text{H}_2\text{O}$  (20 mL), saturated  $\text{NaCl}$  (20 mL) and extracted with  $\text{CH}_2\text{Cl}_2$  (20 mL $\times$ 3). The combined organic phases were dried over anhydrous  $\text{Na}_2\text{SO}_4$ , filtered and concentrated under vacuo. The desired product was isolated by flash column chromatography using petroleum ether as eluent to afford thionoester and calculate the yields. [ $\text{P}(\text{C}_6\text{F}_5)_3$  = Tris(pentafluorophenyl)phosphine]

**Experimental procedures for the for scale-up of the reaction.**

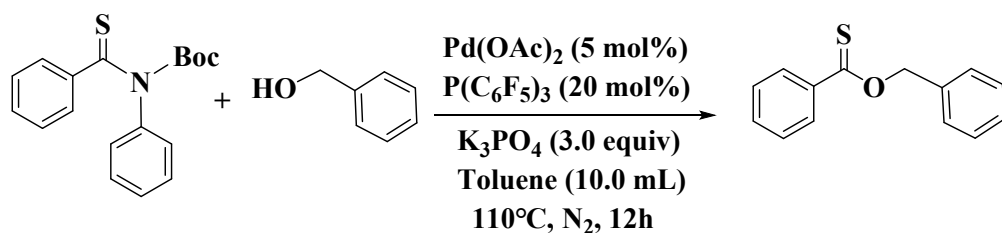

A sealed tube equipped with a stir bar was charged with tert-butyl phenyl(phenylcarbonothioyl)carbamate (5 mmol, 1.0 equiv, 1.57 g), phenylmethanol

(10 mmol, 2.0 equiv, 1.08 g), Pd(OAc)<sub>2</sub> (5 mol%, 56 mg), P(C<sub>6</sub>F<sub>5</sub>)<sub>3</sub> (20 mol%, 0.53 g), K<sub>3</sub>PO<sub>4</sub> (3.0 equiv, 3.18 g) and toluene (10.0 ml) under a N<sub>2</sub> atmosphere. The reaction mixture was placed in an oil bath and stirred for 12 h at 110 °C. Then the mixture was cooled to room temperature, washed with H<sub>2</sub>O (20 mL), saturated NaCl (20 mL) and extracted with CH<sub>2</sub>Cl<sub>2</sub> (20 mL×3). The combined organic phases were dried over anhydrous Na<sub>2</sub>SO<sub>4</sub>, filtered and concentrated under vacuo. The desired product was isolated by flash column chromatography using petroleum ether as eluent to afford *O*-benzyl benzothioate (yellow liquid) and the yields is 75% (85.6 mg). [P(C<sub>6</sub>F<sub>5</sub>)<sub>3</sub> = Tris(pentafluorophenyl)phosphine]

**Experimental procedures for control reaction.**



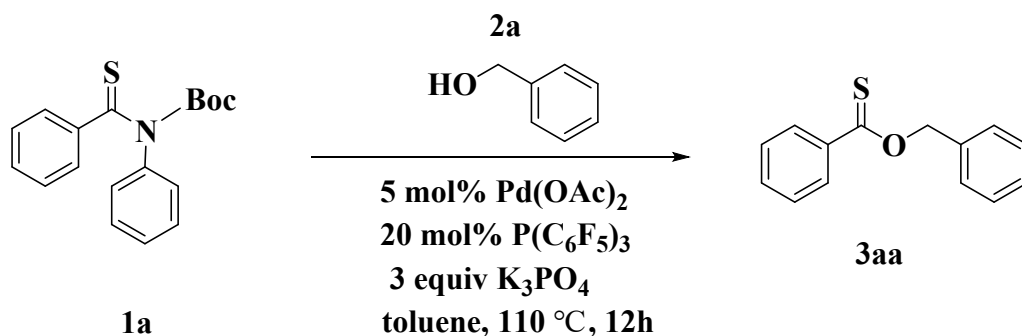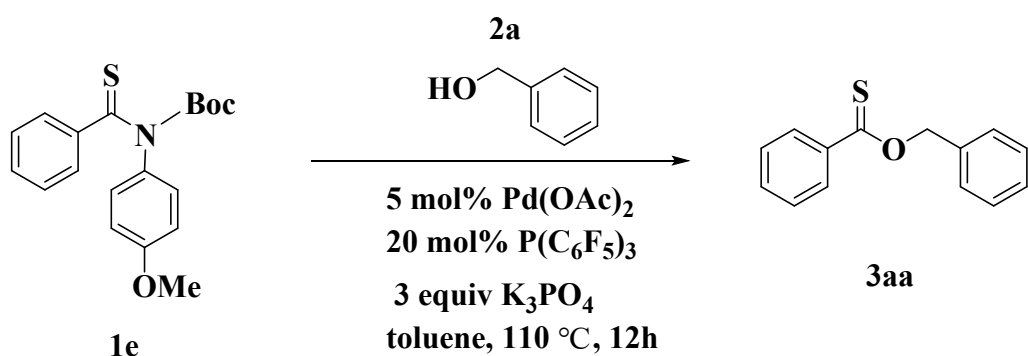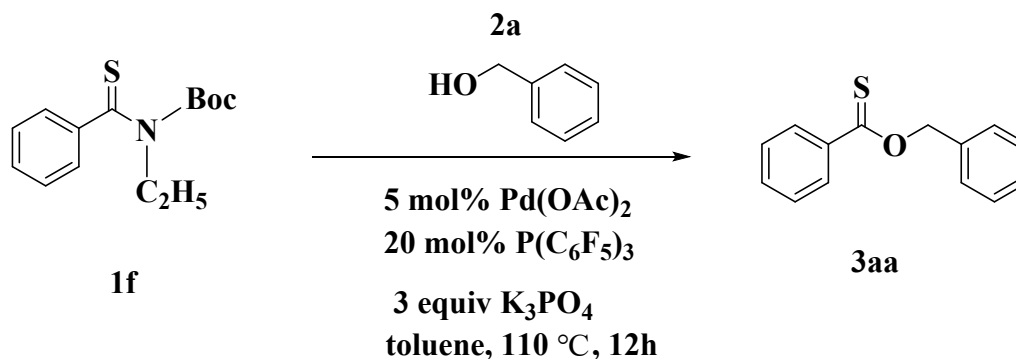

A sealed tube equipped with a stir bar was charged with thioamides (5 mmol, 1.0 equiv, 1.57 g), phenylmethanol (10 mmol, 2.0 equiv, 1.08 g), Pd(OAc)<sub>2</sub> (5 mol%, 56 mg), P(C<sub>6</sub>F<sub>5</sub>)<sub>3</sub> (20 mol%, 0.53 g), K<sub>3</sub>PO<sub>4</sub> (3.0 equiv, 3.18 g) and toluene (10.0 ml) under a N<sub>2</sub> atmosphere. The reaction mixture was placed in an oil bath and stirred for 12 h at 110 °C. Then the mixture was cooled to room temperature, washed with H<sub>2</sub>O (20 mL), saturated NaCl (20 mL) and extracted with CH<sub>2</sub>Cl<sub>2</sub> (20 mL×3). The combined organic phases were dried over anhydrous Na<sub>2</sub>SO<sub>4</sub>, filtered and concentrated under vacuo. The desired product was isolated by flash column

chromatography using petroleum ether as eluent to afford *O*-benzyl benzothioate (yellow liquid) and the yields were calculated. [P(C<sub>6</sub>F<sub>5</sub>)<sub>3</sub> = Tris(pentafluorophenyl)phosphine]

## References

- [1] H. Jin, X. Chen, C. Qian, X. Ge, S. Zhou, *Eur. J. Org. Chem.* **2021**, 2021, 3403-3406.
- [2] N. T. Do, K. M. Tran, H. T. Phan, T. A. To, T. T. Nguyen, N. T. Phan, *Org. Biomol. Chem.* **2019**, 17, 8987-8991.
- [3] A. A. Folgueziras-Amador, X.-Y. Qian, H. Xu, T. Wirth, *Chem. Eur. J.* **2018**, 24, 487-491.
- [4] M. A. Shalaby, H. Rapoport, *J. Org. Chem.* **1999**, 64, 1065-1070.
- [5] J. J. Newton, R. Britton, C. M. Friesen, *J. Org. Chem.* **2018**, 83, 12784-12792.
- [6] S.-K. Yeo, B.-G. Choi, J.-D. Kim, J.-H. Lee, *Bull. Korean Chem. Soc.* **2002**, 23, 1029-1030.
- [7] J. Newton, D. Driedger, M. B. Nodwell, P. Schaffer, R. E. Martin, R. Britton, C. M. Friesen, *Chem. Eur. J.* **2019**, 25, 15993-15997.

**Copies of <sup>1</sup>H, <sup>13</sup>C, <sup>19</sup>F, NMR, Mass Spectra and HRMS**

**Figure S1. *N*-phenylbenzothioamide (1)**

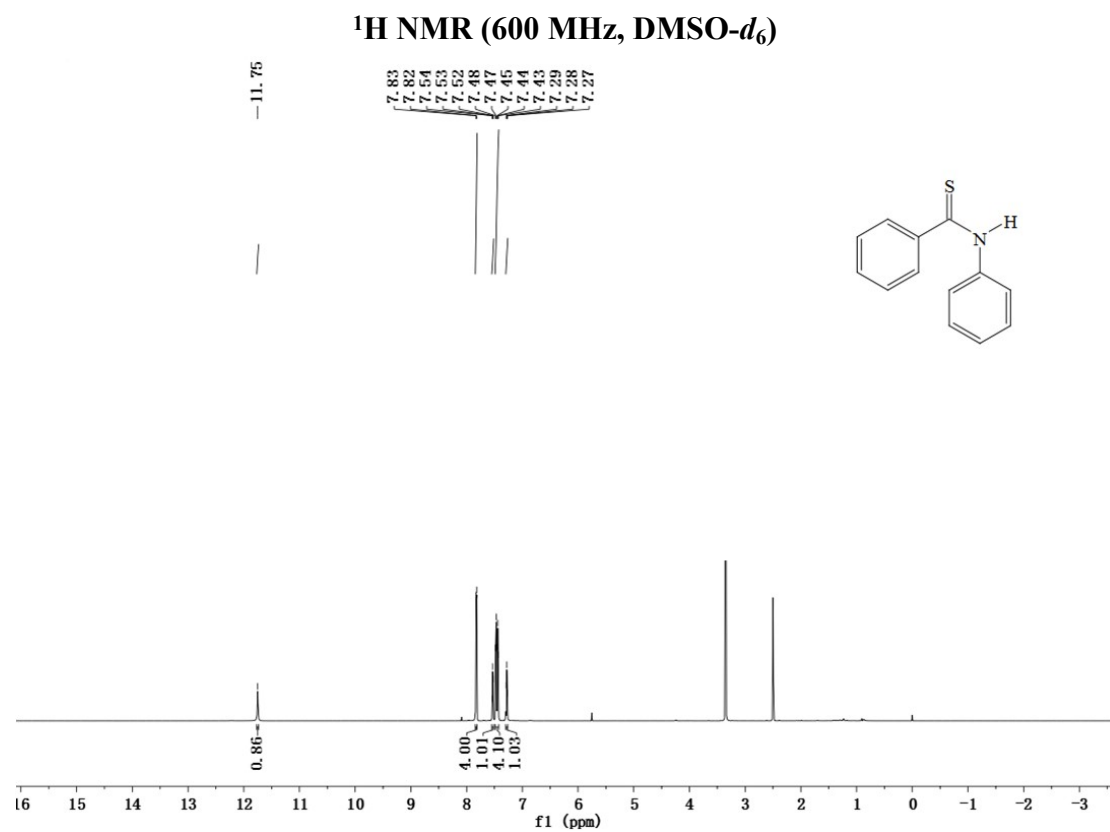

**Figure S2. 4-methyl-N-phenylbenzothioamide (2)**  
 **$^1\text{H}$  NMR (600 MHz,  $\text{DMSO-}d_6$ )**

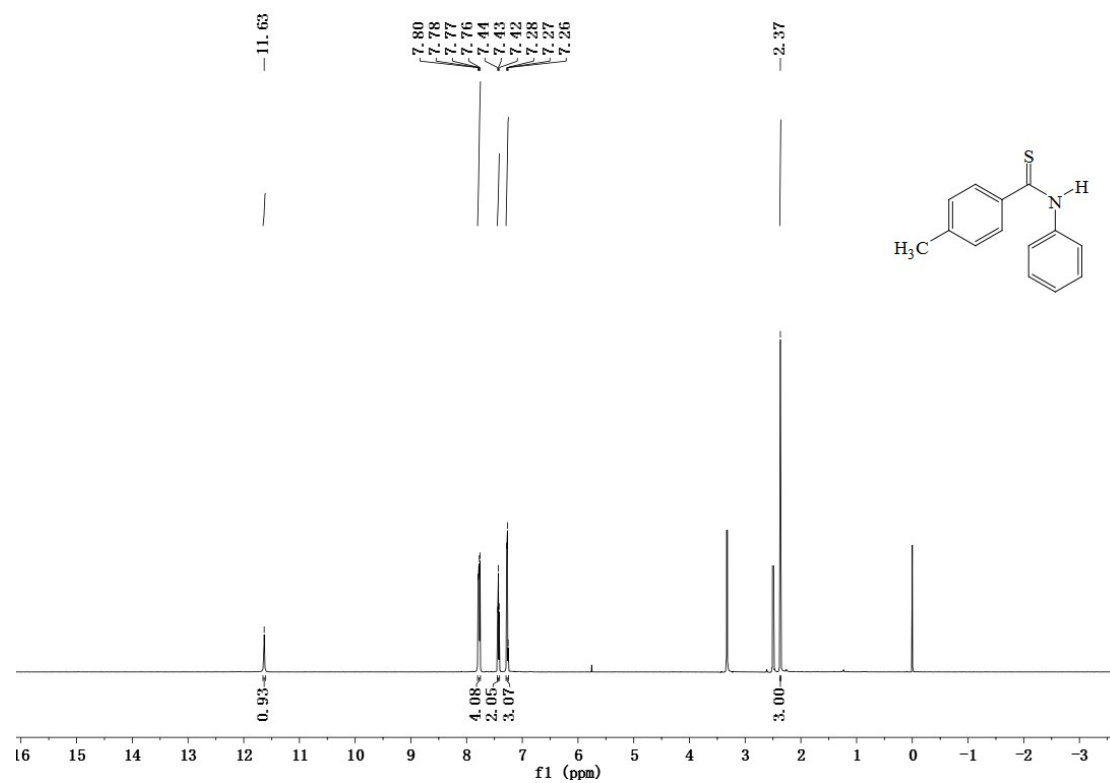

**Figure S3. 4-methoxy-*N*-phenylbenzothioamide (3)**  
 $^1\text{H}$  NMR (600 MHz,  $\text{DMSO-}d_6$ )

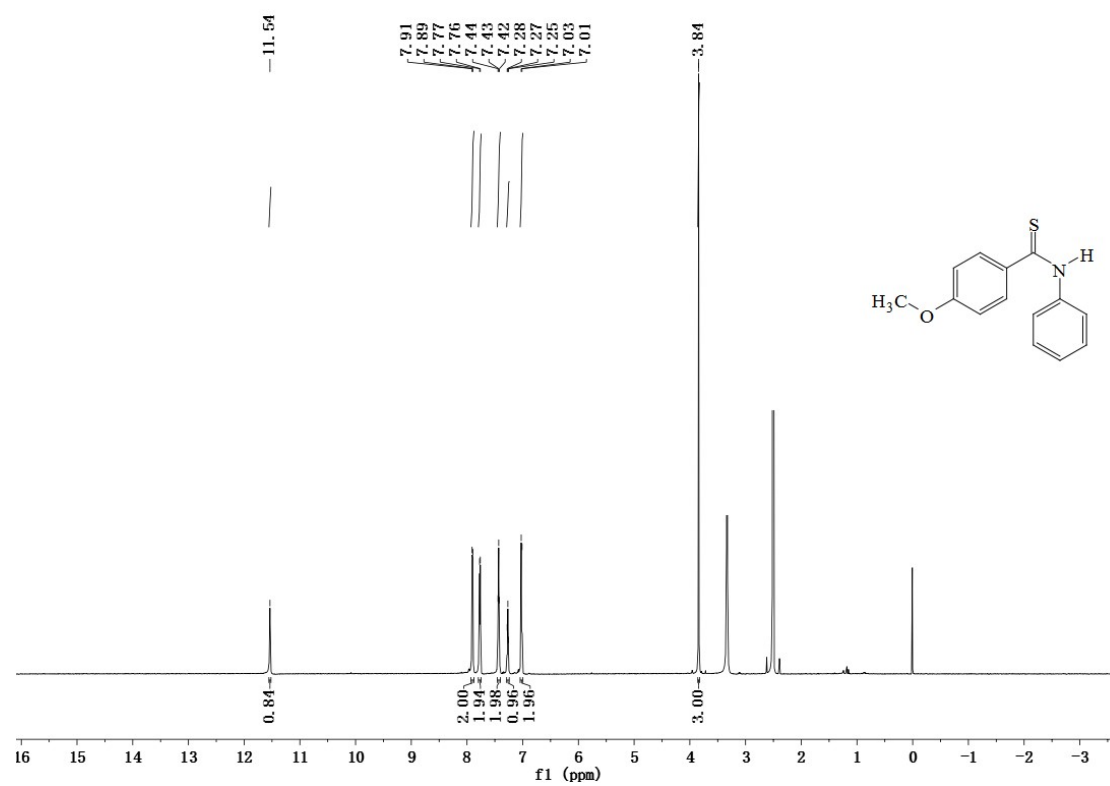

**Figure S4. tert-butyl phenyl(phenylcarbonothioyl)carbamate (1a)**  
 $^1\text{H}$  NMR (600 MHz,  $\text{CDCl}_3$ )

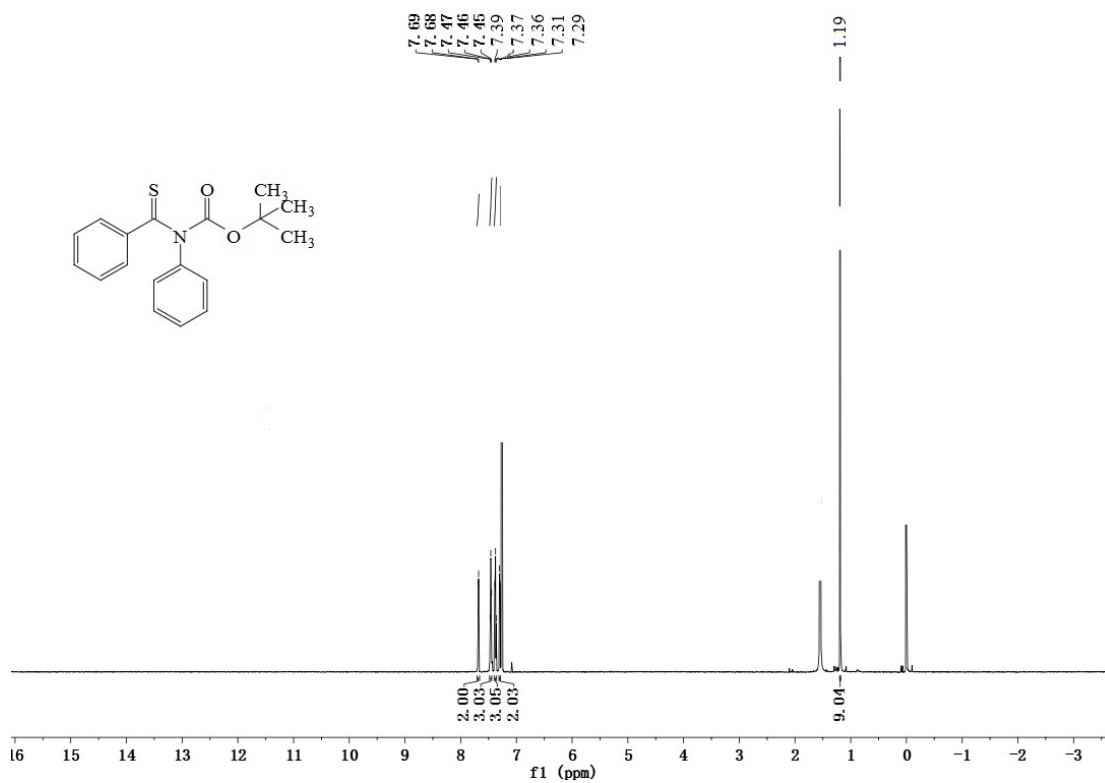

Figure S5. tert-butyl phenyl(phenylcarbonothioyl)carbamate (1a )  
<sup>13</sup>C NMR (150 MHz, CDCl<sub>3</sub>)

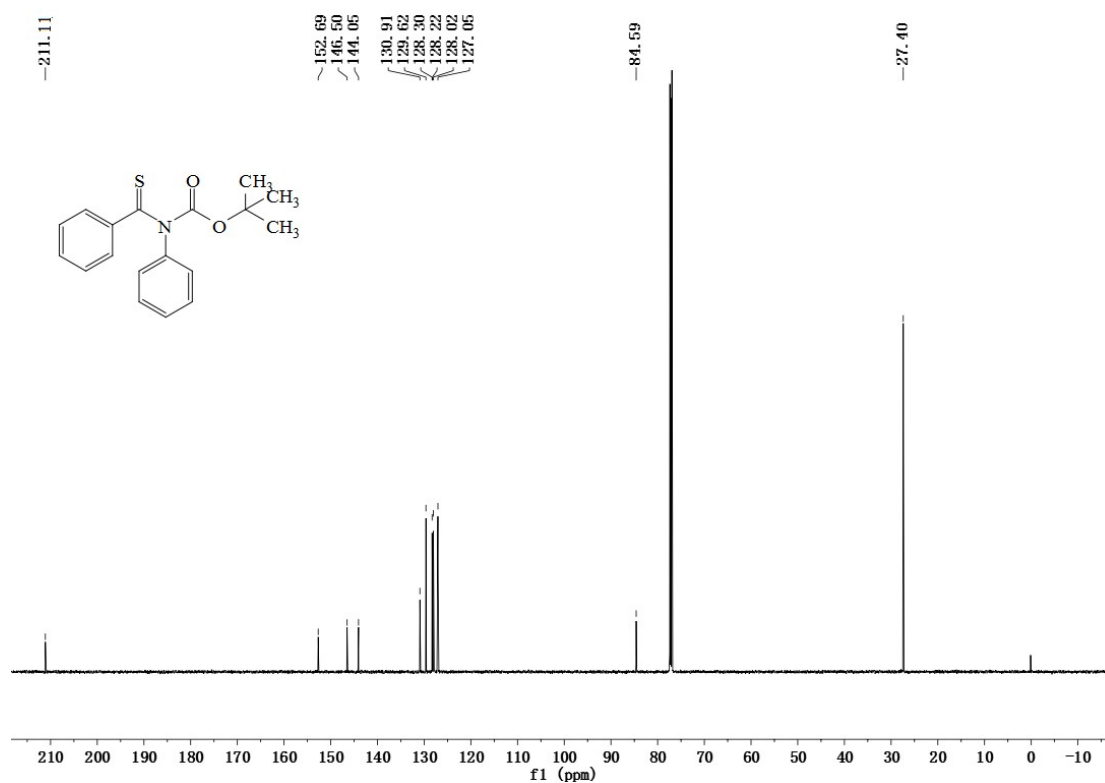

Figure S6. tert-butyl phenyl(phenylcarbonothioyl)carbamate (1a )  
 Mass spectrum

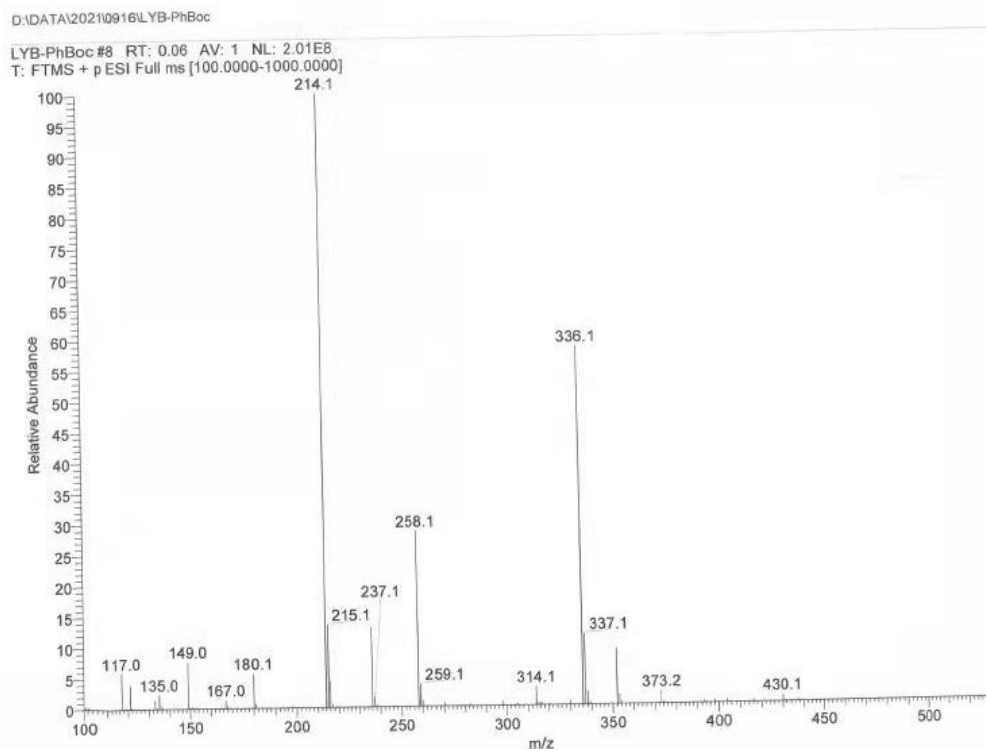

**Figure S7. tert-butyl phenyl(phenylcarbonothioyl)carbamate (1a )  
HRMS**

National Center for Organic Mass Spectrometry in Shanghai  
Shanghai Institute of Organic Chemistry  
Chinese Academic of Sciences  
High Resolution ESI-MS REPORT

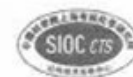

Instrument: Thermo Scientific Q Exactive HF Orbitrap-FTMS

Card Serial Number: E212376

Sample Serial Number: LYB-PhBoc

Operator: Songw Date: 2021/09/16

Operation Mode: ESI Positive Ion Mode

Elemental composition search on mass 336.1029

m/z= 331.1029-341.1029

| m/z      | Theo. Mass | Delta (ppm) | RDB equiv. | Composition                                         |
|----------|------------|-------------|------------|-----------------------------------------------------|
| 336.1029 | 336.1029   | 0.21        | 9.5        | C <sub>18</sub> H <sub>19</sub> O <sub>2</sub> NNaS |

**Figure S8. tert-butyl (4-methylphenylcarbonothioyl)(phenyl)carbamate (1b)**

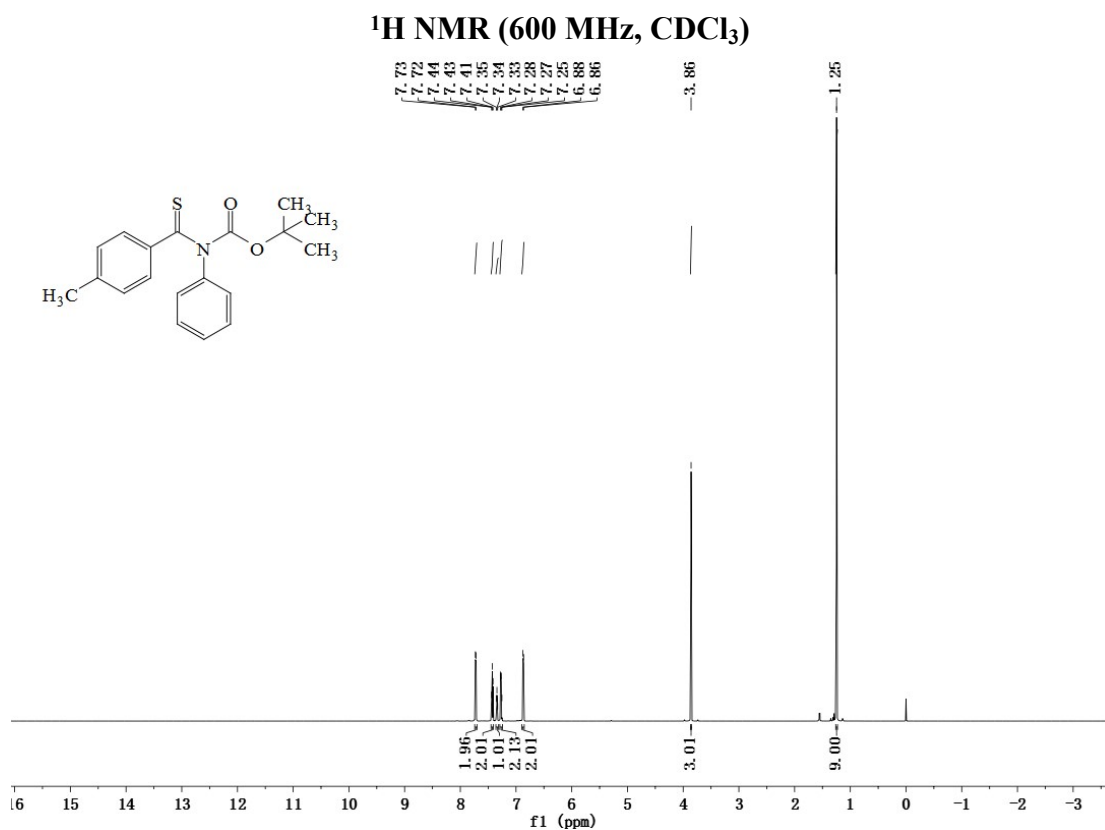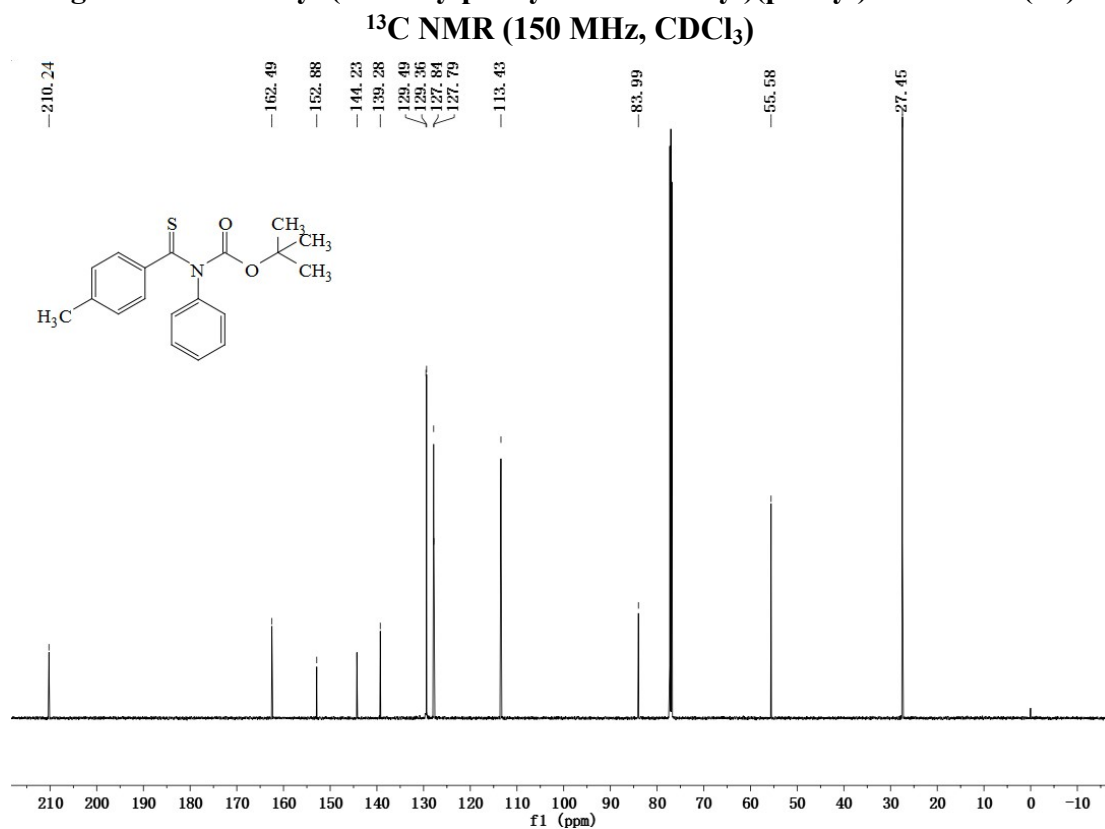

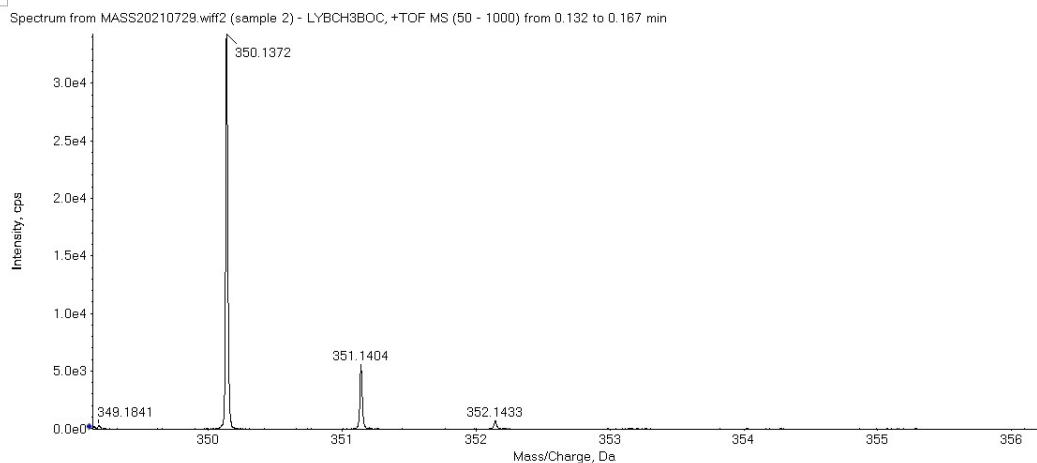

**Figure S11. tert-butyl (4-methoxyphenylcarbonothioyl)(phenyl)carbamate (1c)**  
<sup>1</sup>H NMR (600 MHz, CDCl<sub>3</sub>)

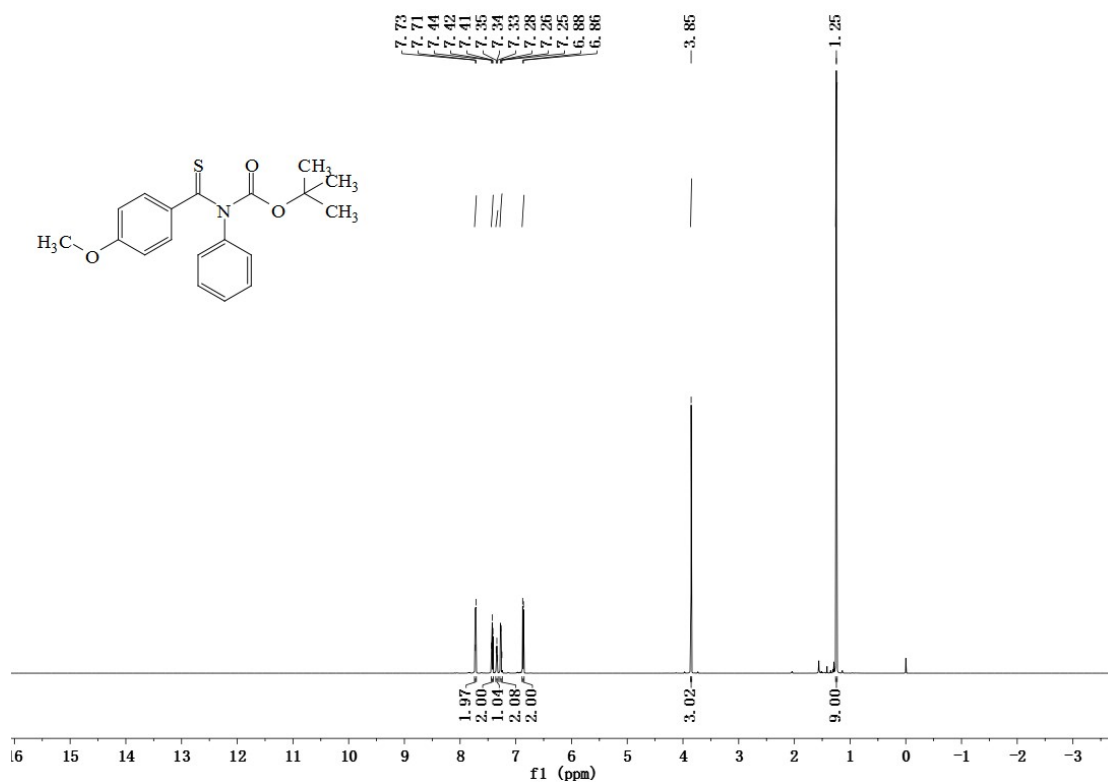

**Figure S12. tert-butyl (4-methoxyphenylcarbonothioyl)(phenyl)carbamate (1c)**



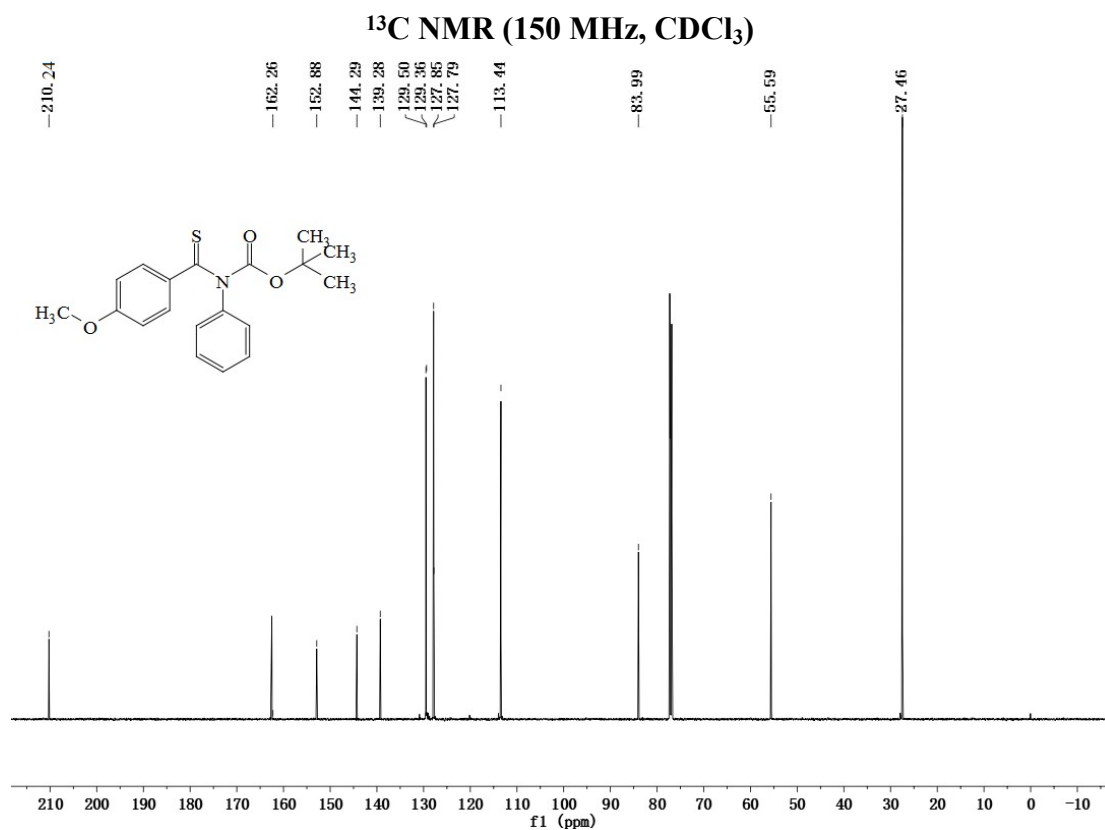

**Figure S13. tert-butyl (4-methoxyphenylcarbonothioyl)(phenyl)carbamate (1c)  
Mass spectrum**

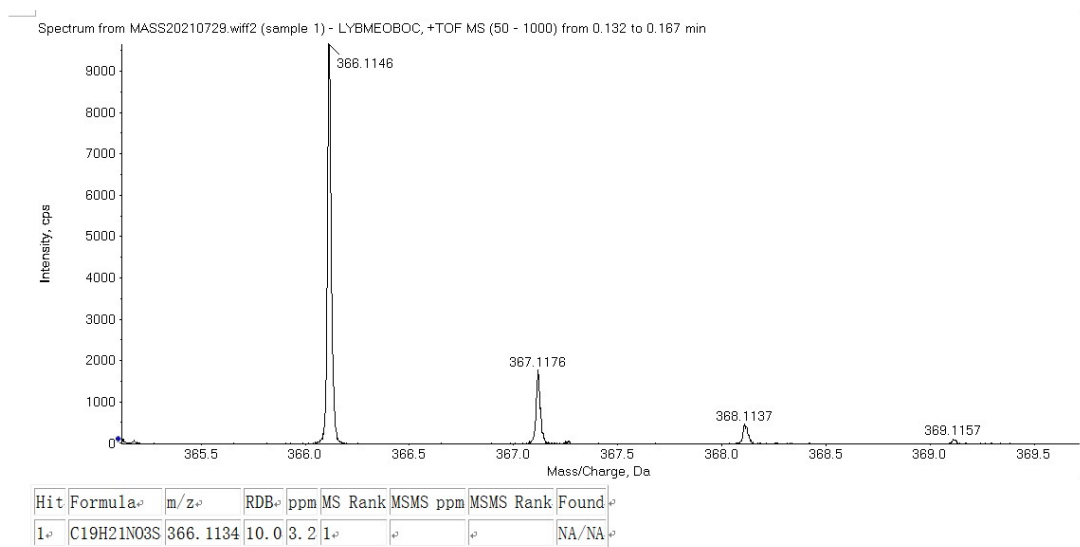

**Figure S14. tert-butyl (4-fluorophenylcarbonothioyl)(phenyl)carbamate (1d)  
<sup>1</sup>H NMR (600 MHz, CDCl<sub>3</sub>)**

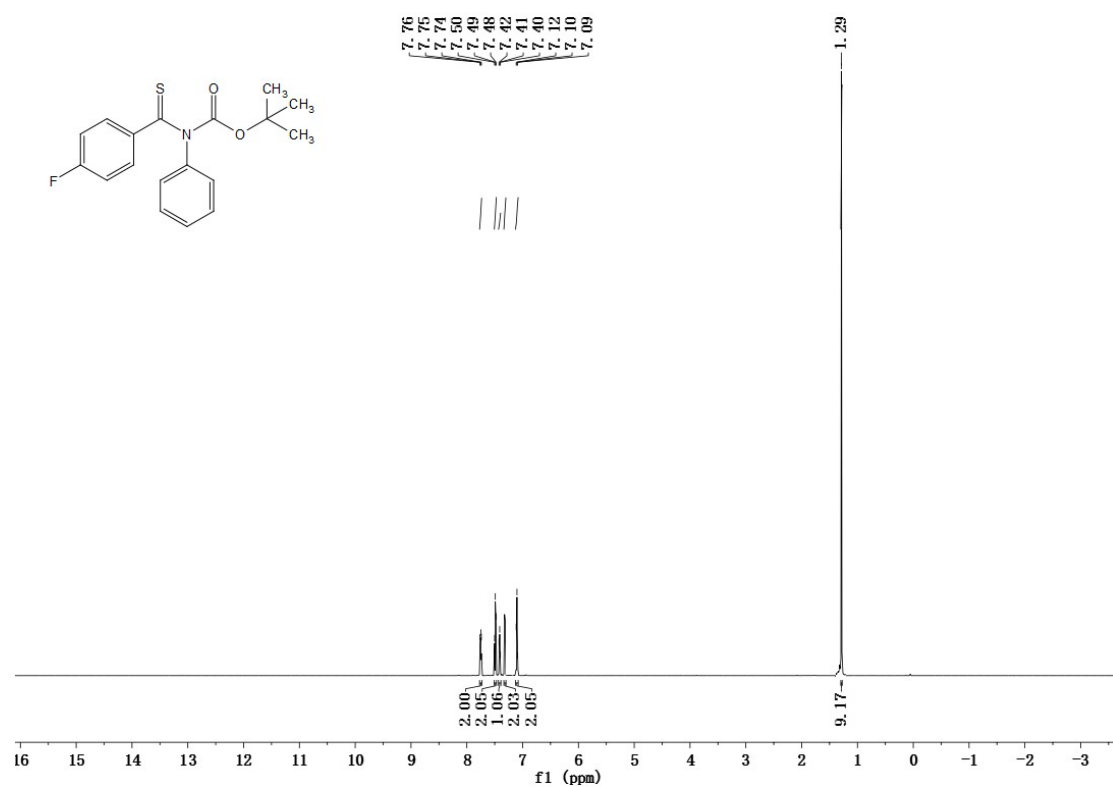

**Figure S15. tert-butyl (4-fluorophenylcarbonothioyl)(phenyl)carbamate (1d)**  
<sup>13</sup>C NMR (150 MHz, CDCl<sub>3</sub>)

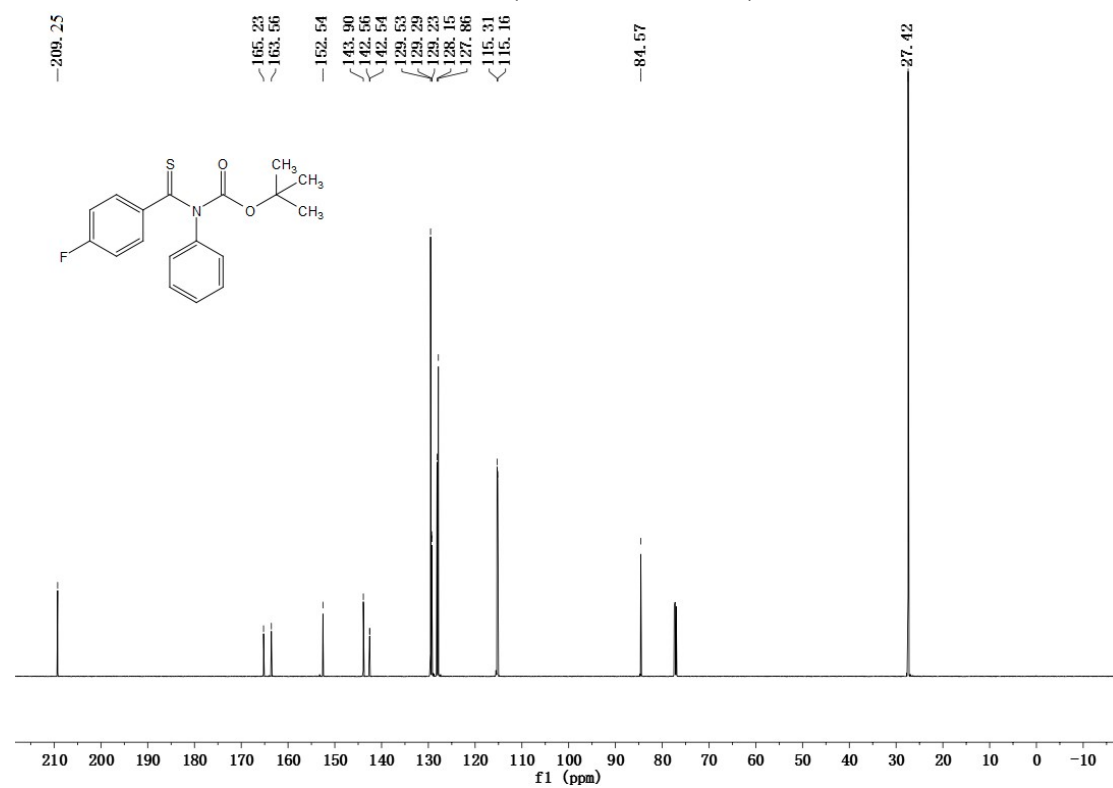

**Figure S16. tert-butyl (4-fluorophenylcarbonothioyl)(phenyl)carbamate (1d)**  
<sup>19</sup>F NMR (565 MHz, CDCl<sub>3</sub>)

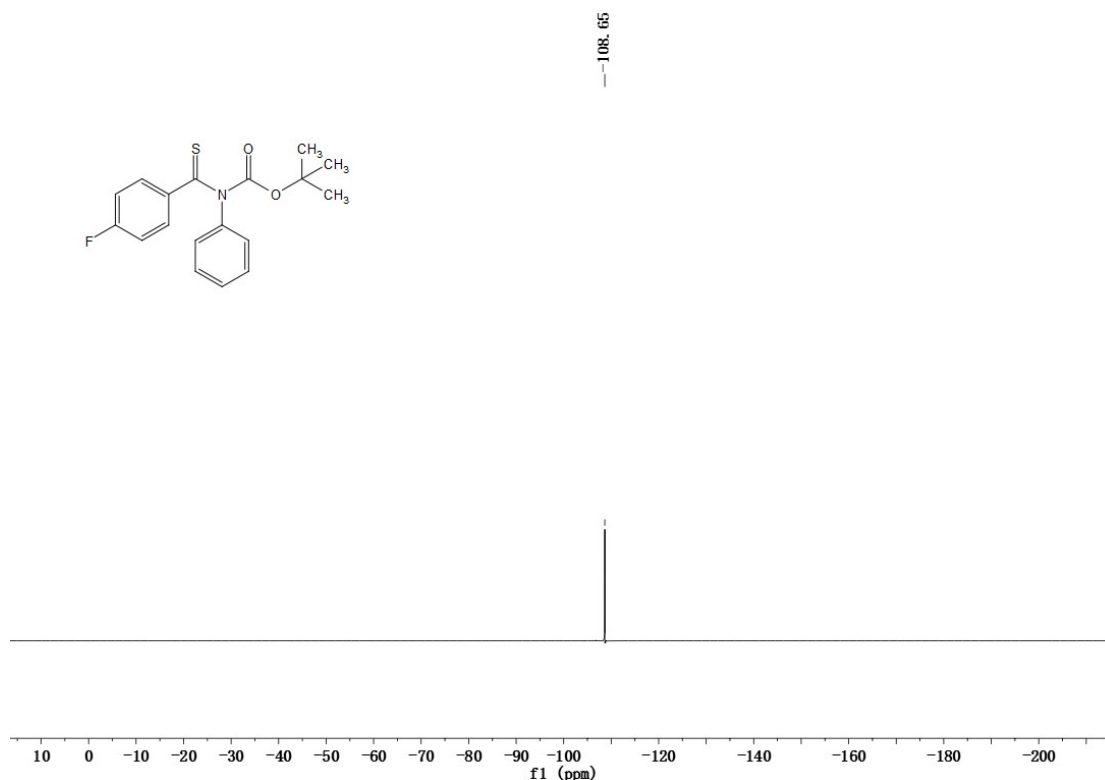

**Figure S17. tert-butyl (4-fluorophenylcarbonothioyl)(phenyl)carbamate (1d)  
HRMS**

**Elemental Composition Report**

Page 1

**Single Mass Analysis**

Tolerance = 30.0 PPM / DBE: min = -1.5, max = 50.0

Element prediction: Off

Number of isotope peaks used for i-FIT = 3

Monoisotopic Mass, Even Electron Ions

550 formula(e) evaluated with 1 results within limits (up to 50 best isotopic matches for each mass)

Elements Used:

C: 18-18 H: 5-45 N: 1-2 O: 1-9 S: 1-3 I: 0-3 F: 1-12

4

0126-4-lyb-f 233 (1.303)

1: TOF MS ES+  
1.02e+002

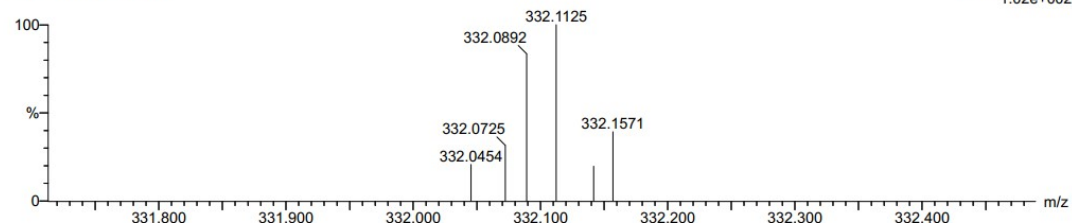

Minimum: -1.5  
Maximum: 5.0 30.0 50.0

| Mass     | Calc. Mass | mDa | PPM | DBE | i-FIT | Norm | Conf(%) | Formula          |
|----------|------------|-----|-----|-----|-------|------|---------|------------------|
| 332.1125 | 332.1121   | 0.4 | 1.2 | 9.5 | 31.0  | n/a  | n/a     | C18 H19 N O2 S F |

**Figure S18. tert-butyl (4-methoxyphenyl)(phenylcarbonothioyl)carbamate (1e)**

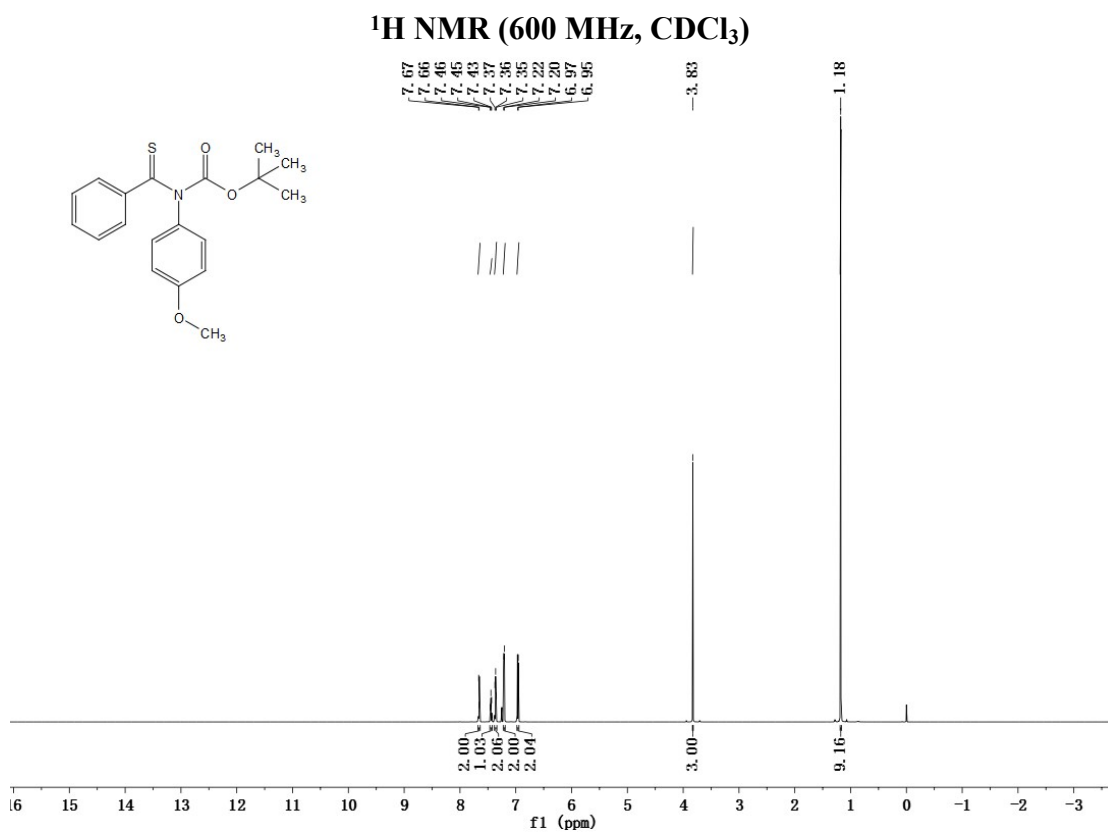

**Figure S19. tert-butyl (4-methoxyphenyl)(phenylcarbonothioyl)carbamate (1e)**

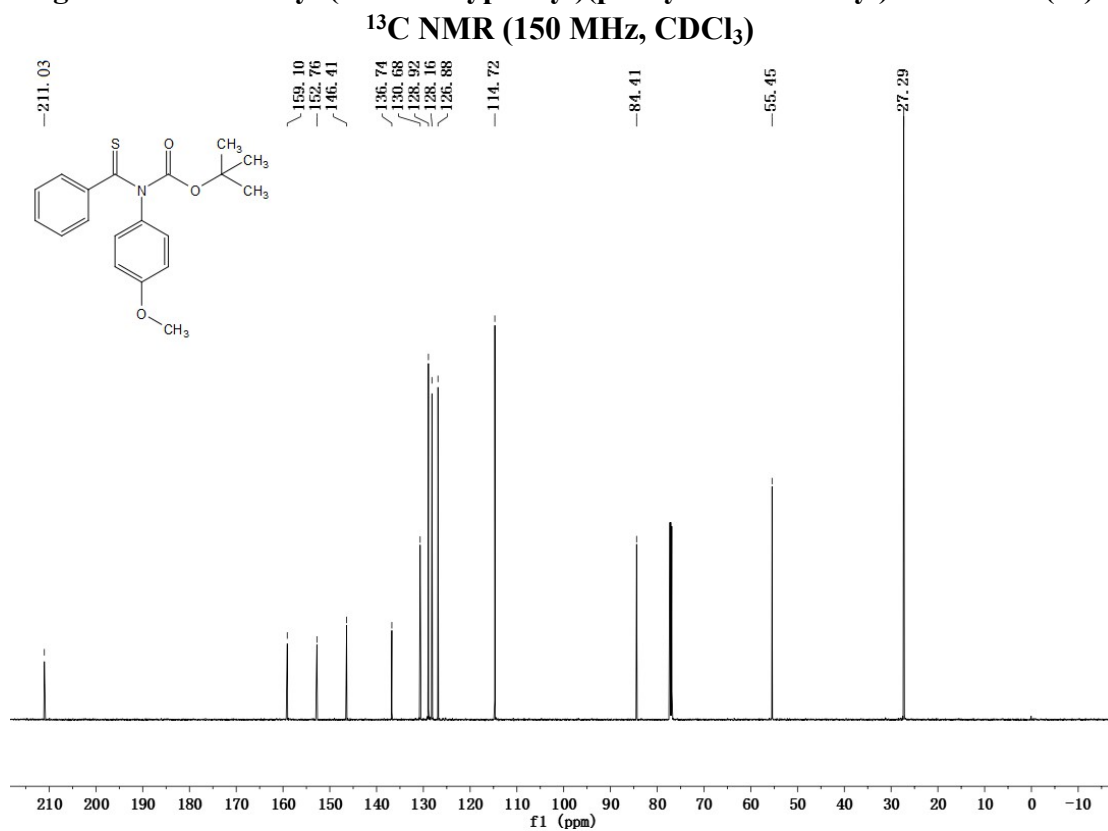

**Figure S20. tert-butyl (4-methoxyphenyl)(phenylcarbonothioyl)carbamate (1e)**

# HRMS

## Elemental Composition Report

Page 1

### Single Mass Analysis

Tolerance = 30.0 PPM / DBE: min = -1.5, max = 50.0

Element prediction: Off

Number of isotope peaks used for i-FIT = 3

Monoisotopic Mass, Even Electron Ions

101 formula(e) evaluated with 1 results within limits (up to 50 best isotopic matches for each mass)

Elements Used:

C: 19-19 H: 5-45 N: 1-2 O: 1-9 S: 1-3 I: 0-3

4

0126-4-lyb-phboc 164 (0.925)

1: TOF MS ES+  
1.01e+003

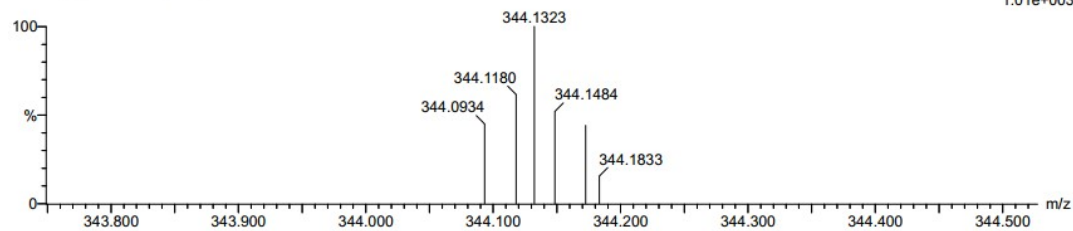

Minimum: -1.5  
Maximum: 50.0

| Mass     | Calc. Mass | mDa | PPM | DBE | i-FIT | Norm | Conf(%) | Formula        |
|----------|------------|-----|-----|-----|-------|------|---------|----------------|
| 344.1323 | 344.1320   | 0.3 | 0.9 | 9.5 | 58.5  | n/a  | n/a     | C19 H22 N O3 S |

Figure S21. tert-butyl ethyl(phenylcarbonothioyl)carbamate (1f)

<sup>1</sup>H NMR (600 MHz, CDCl<sub>3</sub>)

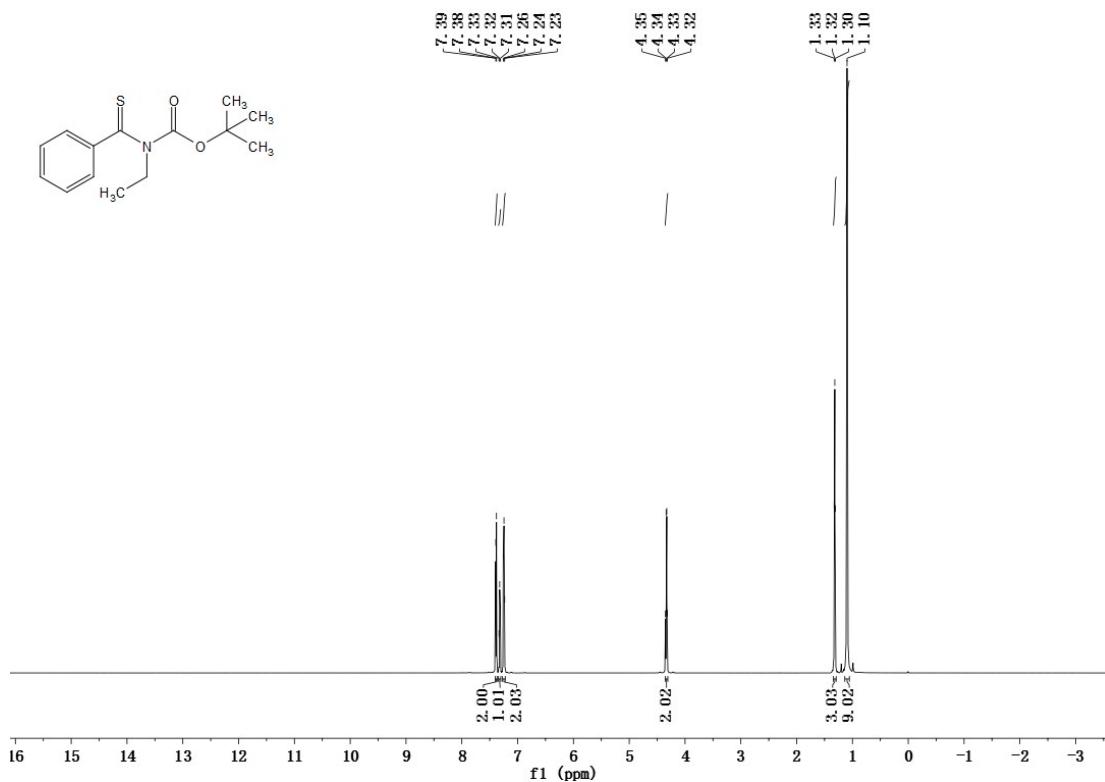

Figure S22. tert-butyl ethyl(phenylcarbonothioyl)carbamate (1f)

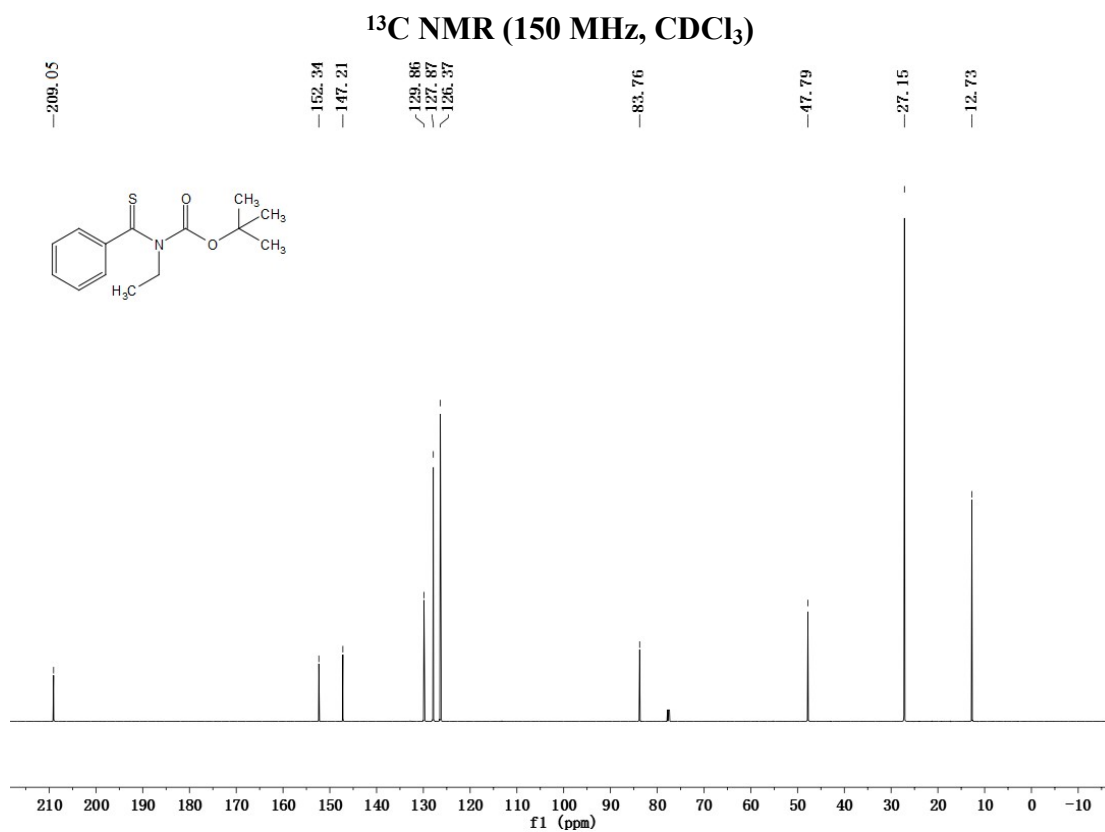

**Figure S23. tert-butyl ethyl(phenylcarbonothioyl)carbamate (1f)  
HRMS**

**Elemental Composition Report**

Page 1

**Single Mass Analysis**

Tolerance = 30.0 PPM / DBE: min = -1.5, max = 50.0

Element prediction: Off

Number of isotope peaks used for i-FIT = 3

Monoisotopic Mass, Even Electron Ions

66 formula(e) evaluated with 1 results within limits (up to 50 best isotopic matches for each mass)

Elements Used:

C: 14-14 H: 5-45 N: 1-2 O: 1-9 S: 1-3 I: 0-3

4

0126-lyb-ya 121 (0.692)

1: TOF MS ES+  
1.44e+002

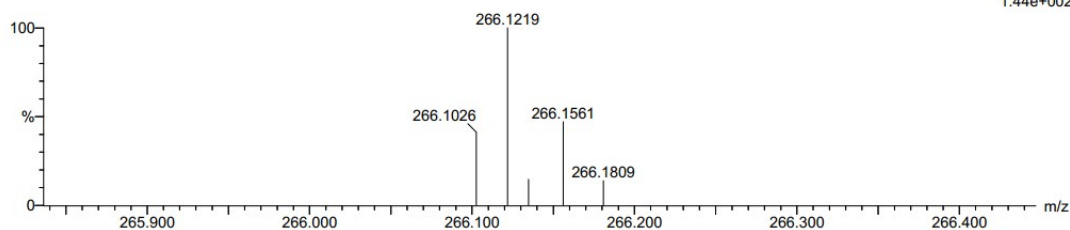

Minimum: -1.5  
Maximum: 5.0 30.0 50.0

| Mass     | Calc. Mass | mDa | PPM | DBE | i-FIT | Norm | Conf(%) | Formula                                                         |
|----------|------------|-----|-----|-----|-------|------|---------|-----------------------------------------------------------------|
| 266.1219 | 266.1215   | 0.4 | 1.5 | 5.5 | 38.6  | n/a  | n/a     | C <sub>14</sub> H <sub>20</sub> N <sub>2</sub> O <sub>2</sub> S |

**Figure S24. tert-butyl (tert-butoxycarbonyl)(phenylcarbonothioyl)carbamate (4a)  
<sup>1</sup>H NMR (600 MHz, CDCl<sub>3</sub>)**

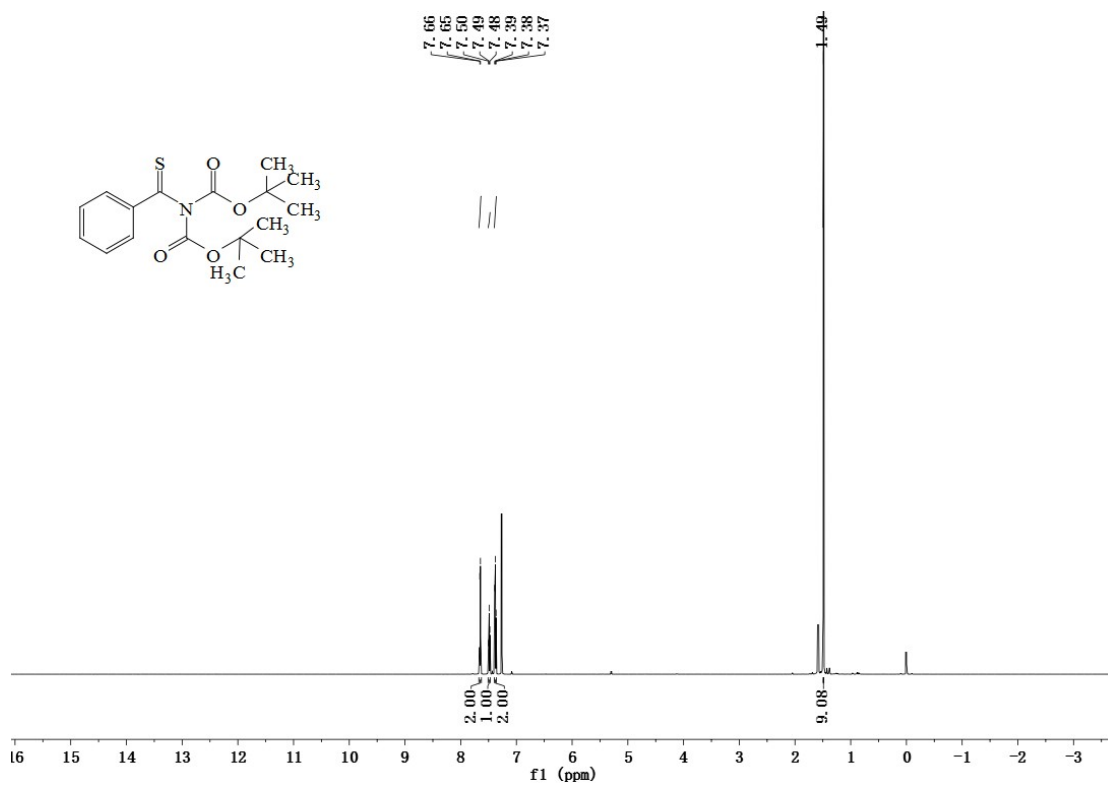

**Figure S25. tert-butyl (tert-butoxycarbonyl)(phenylcarbonothioyl)carbamate (4a)**  
<sup>13</sup>C NMR (101 MHz, CDCl<sub>3</sub>)

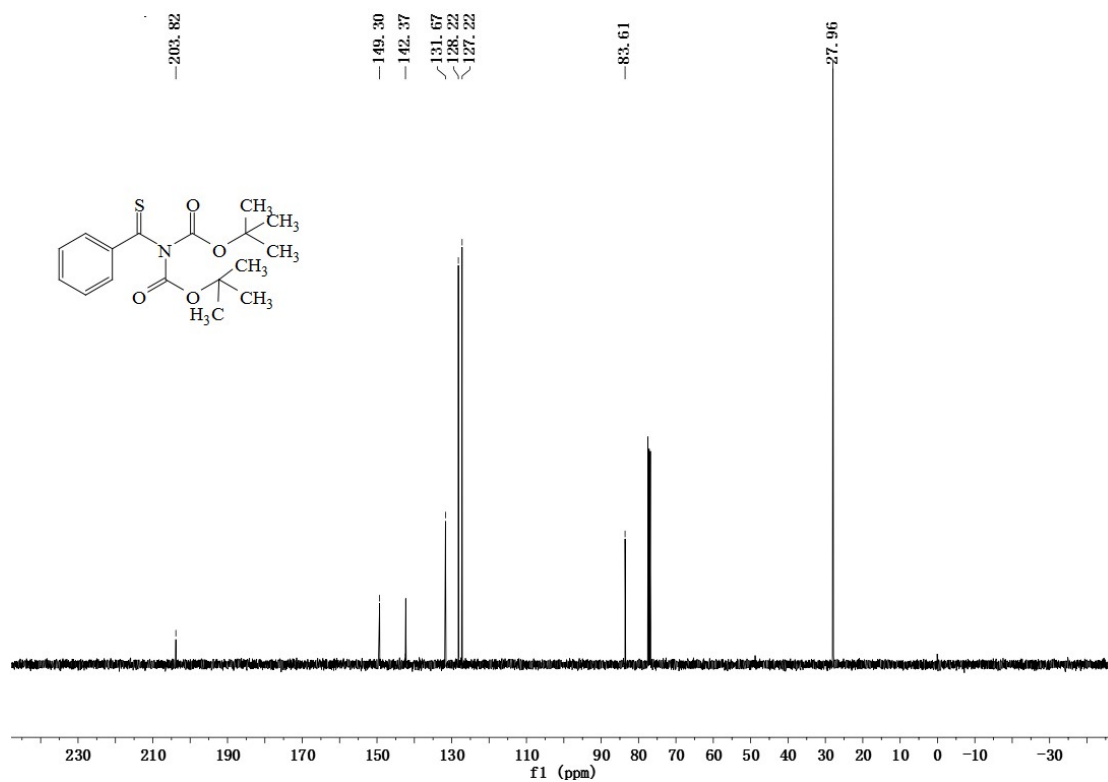

**Figure S26. O-benzyl benzothioate (3aa)**  
<sup>1</sup>H NMR (600 MHz, CDCl<sub>3</sub>)

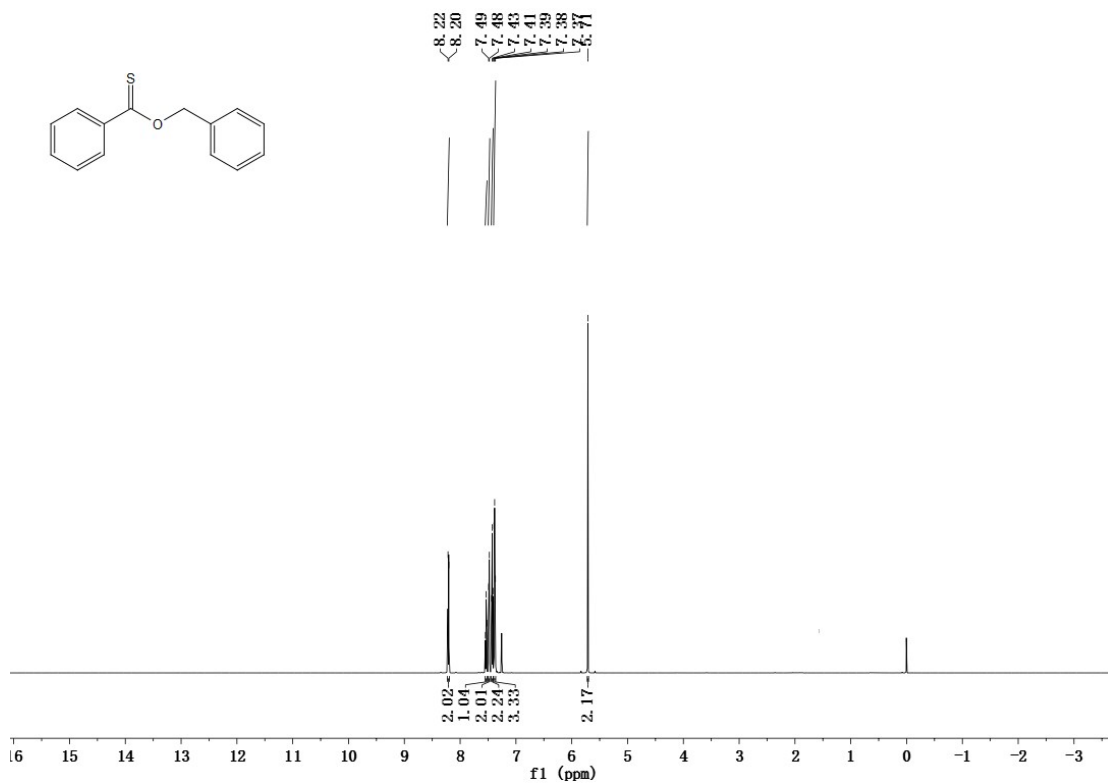

Figure S27. *O*-(4-methylbenzyl) benzothioate (3ab)  
<sup>1</sup>H NMR (600 MHz, CDCl<sub>3</sub>)

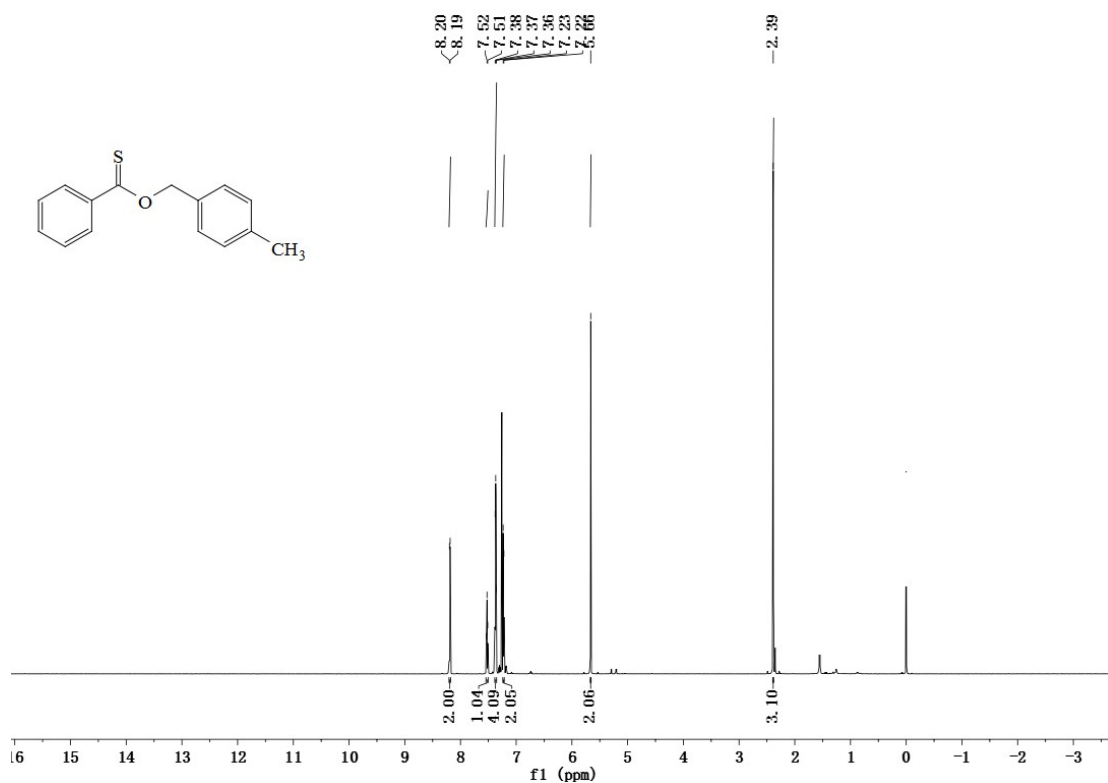

Figure S28. *O*-(2-methylbenzyl) benzothioate (3ac)  
<sup>1</sup>H NMR (600 MHz, CDCl<sub>3</sub>)



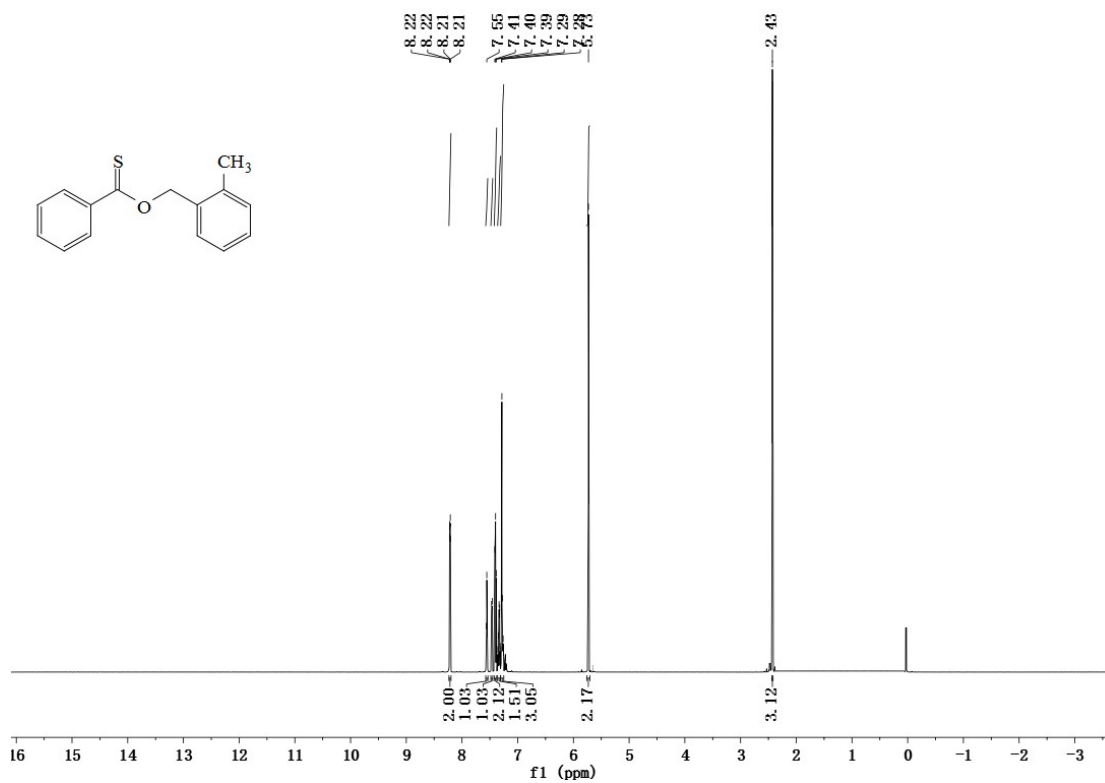

Figure S29. *O*-(2-methylbenzyl) benzothioate (3ac)  
<sup>13</sup>C NMR (150 MHz, CDCl<sub>3</sub>)

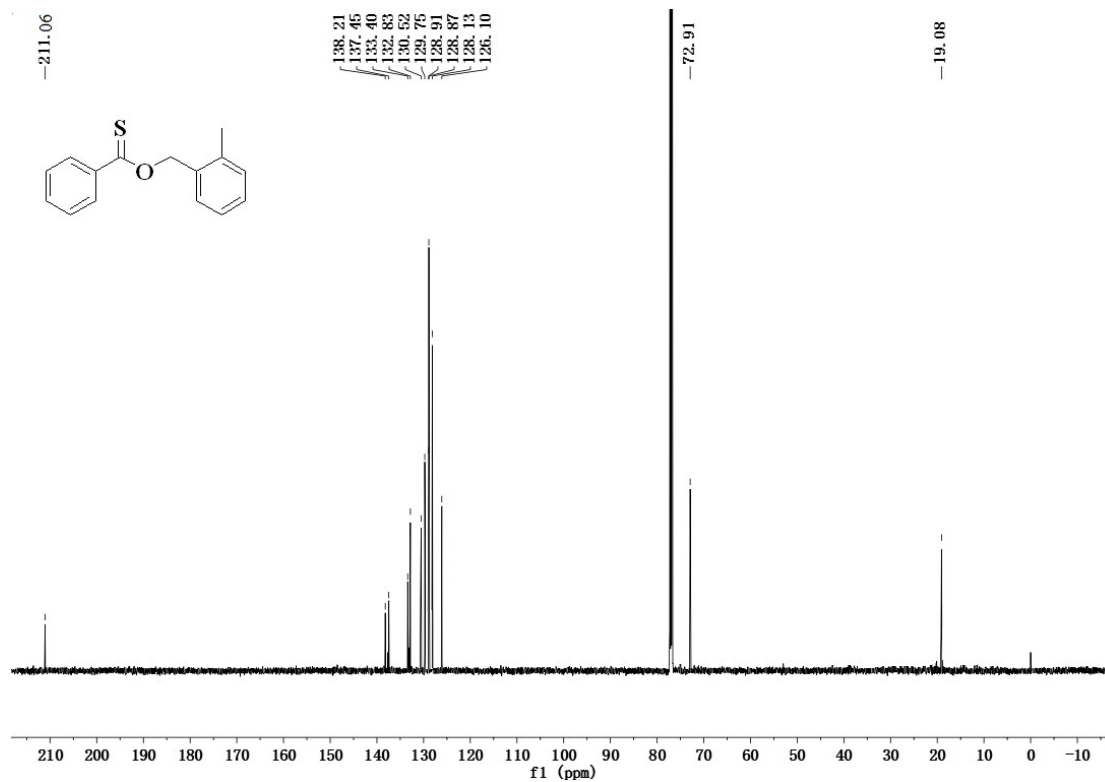

Figure S30. *O*-(2-methylbenzyl) benzothioate (3ac)  
 Mass spectrum

File : D:\DATA\2021\0908H\LYB-2CH3.D  
 Operator : HQ  
 Acquired : 09 Sep 2021 18:05 using AcqMethod DB-SMS-EI-0707.M  
 Instrument : 5977B  
 Sample Name :  
 Misc Info :  
 Vial Number: 7

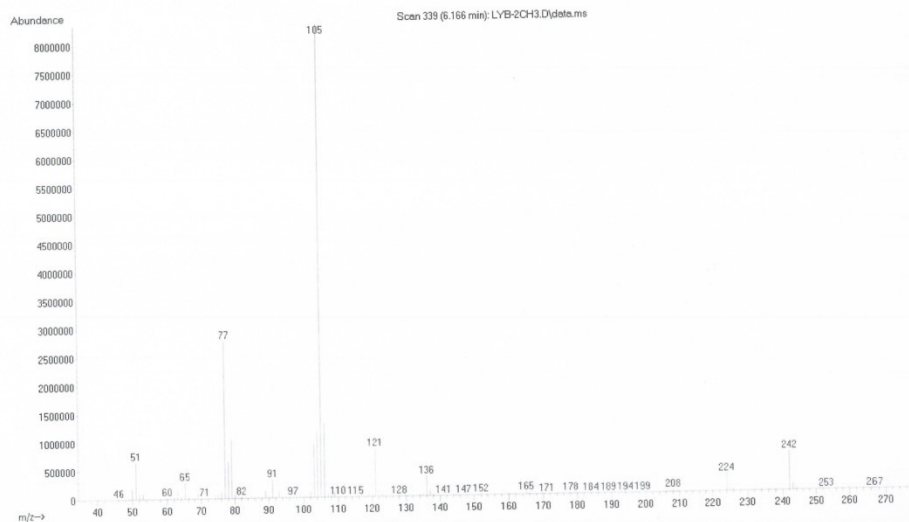

**Figure S31. *O*-(2-methylbenzyl) benzothioate (3ac)  
 HRMS**

National Center for Organic Mass Spectrometry in Shanghai  
 Shanghai Institute of Organic Chemistry  
 Chinese Academic of Sciences  
 High Resolution EI-MS Report  
 Low Resolution EI-MS Report

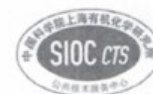

Instrument: Waters Premier GC-TOF MS  
 Operation Mode: EI Positive Ion Mode (Electron Energy: 70eV)  
 Card Serial Number: GCT-P-EI-T21-2408  
 Sample Serial Number: 2019551-LYB-2CH3  
 Operator: Li Date: 2021/09/14

| m/z      | Theo. Mass | Delta (ppm) | RDB equiv. | Composition                                                  |
|----------|------------|-------------|------------|--------------------------------------------------------------|
| 242.0763 | 242.0762   | 0.57        | -5.5       | C <sub>5</sub> H <sub>22</sub> O <sub>3</sub> NBrF           |
|          | 242.0760   | 1.05        | 2.0        | C <sub>9</sub> H <sub>13</sub> O <sub>4</sub> F <sub>3</sub> |
|          | 242.0760   | 1.29        | 9.0        | C <sub>15</sub> H <sub>14</sub> OS                           |
|          | 242.0759   | 1.47        | -9.5       | C <sub>3</sub> H <sub>24</sub> NBrF <sub>3</sub> S           |
|          | 242.0771   | -3.25       | -13.5      | H <sub>25</sub> ONBrF <sub>4</sub> S                         |

**Figure S32. *O*-(4-methoxybenzyl) benzothioate (3ad)  
<sup>1</sup>H NMR (600 MHz, CDCl<sub>3</sub>)**

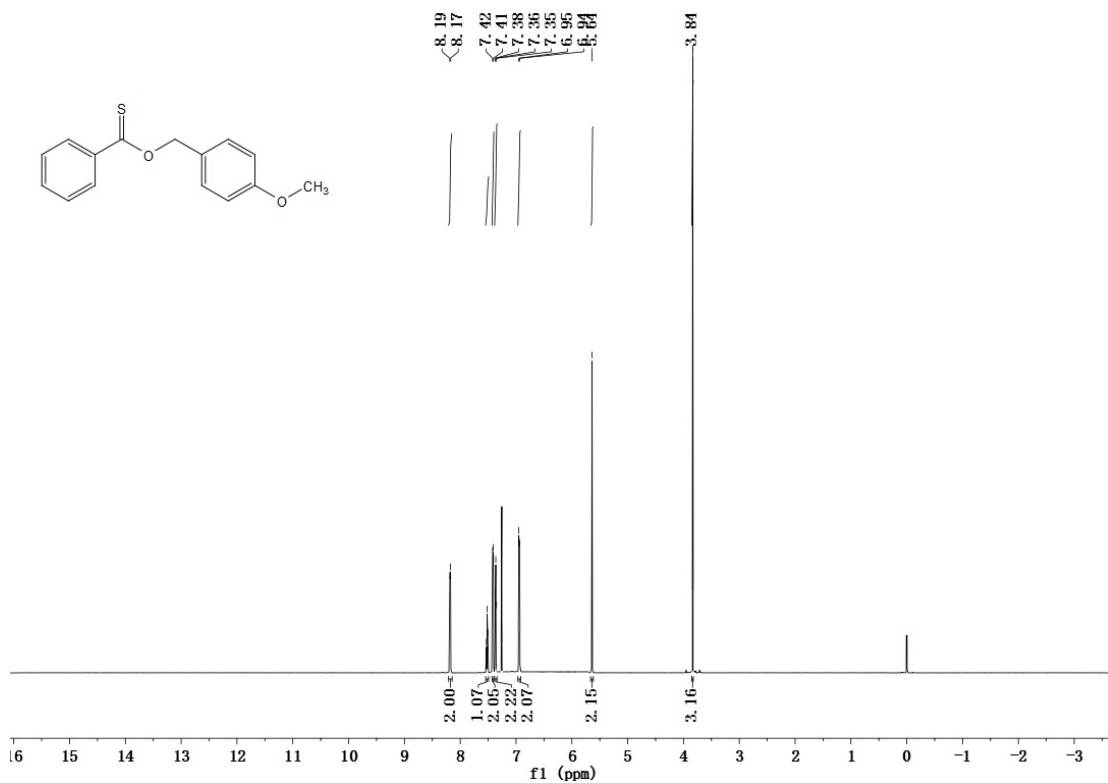

Figure S33. *O*-(4-methoxybenzyl) benzothioate (3ad)  
<sup>13</sup>C NMR (150 MHz, CDCl<sub>3</sub>)

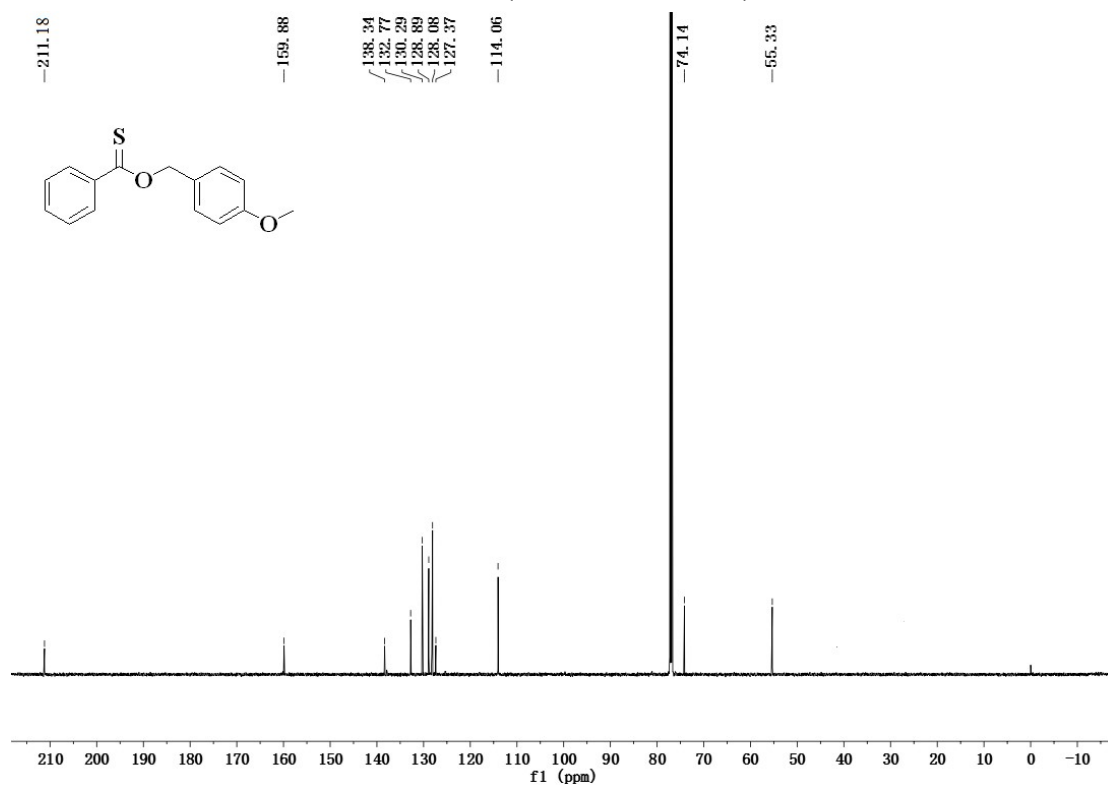

Figure S34. *O*-(4-methoxybenzyl) benzothioate (3ad)  
 Mass spectrum

文件 : E:\5973N date\2021\12\12\13\H212455.D  
 操作员 :  
 已采集 : 14 Dec 2021 9:29 , 使用采集方法 default.m  
 仪器: 5973N  
 样品名: LYB-MeO  
 其他信息 : 258  
 样品瓶号: 1

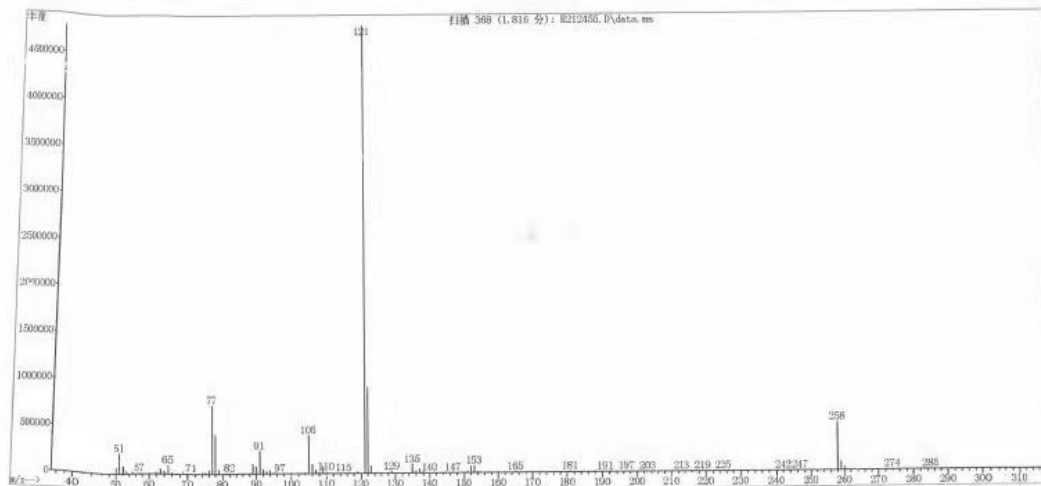

Figure S35. *O*-(4-methoxybenzyl) benzothioate (3ad)  
 HRMS

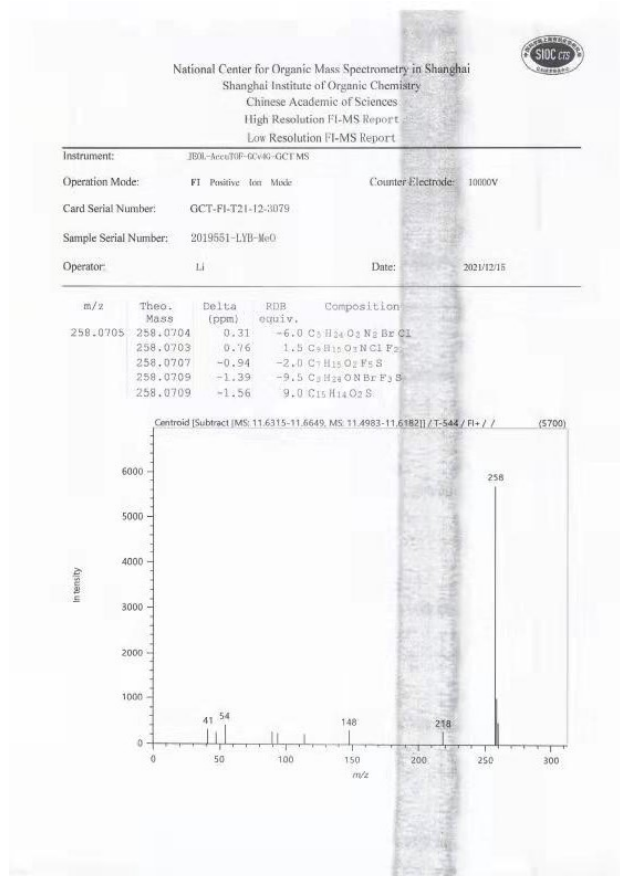

Figure S36. *O*-(4-(trifluoromethyl)benzyl) benzothioate (3ae)  
<sup>1</sup>H NMR (600 MHz, CDCl<sub>3</sub>)

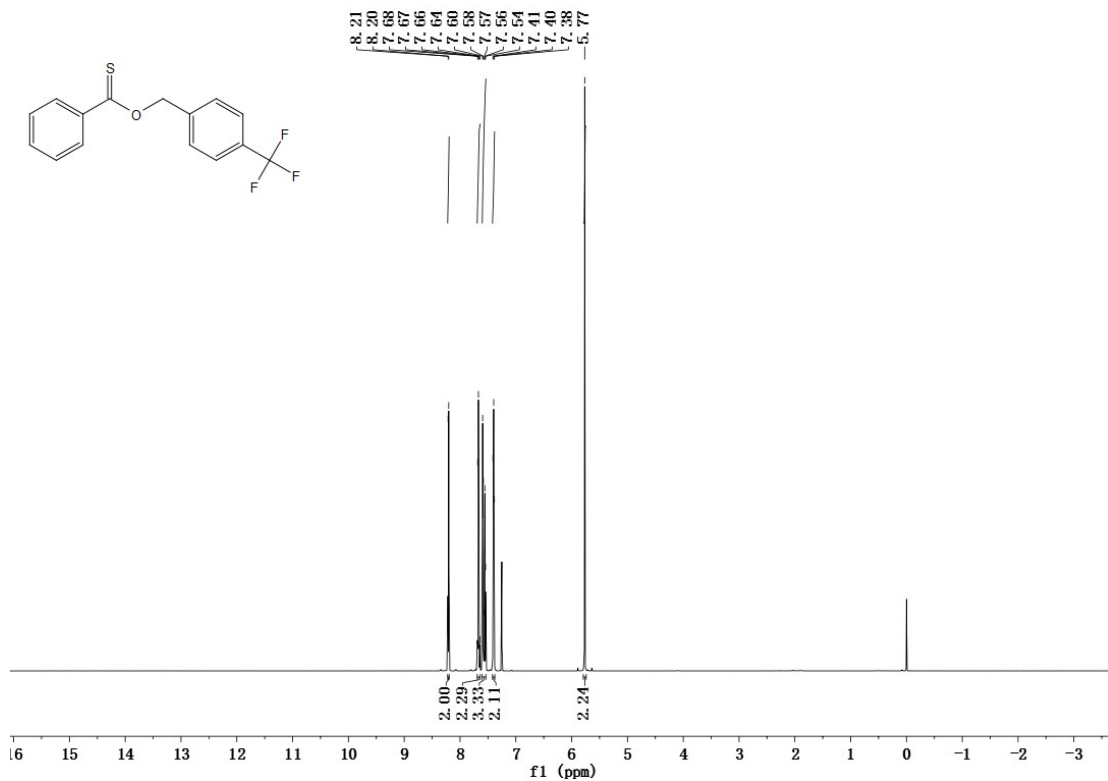

Figure S37. *O*-(4-(trifluoromethyl)benzyl) benzothioate (3ae)  
<sup>13</sup>C NMR (150 MHz, CDCl<sub>3</sub>)

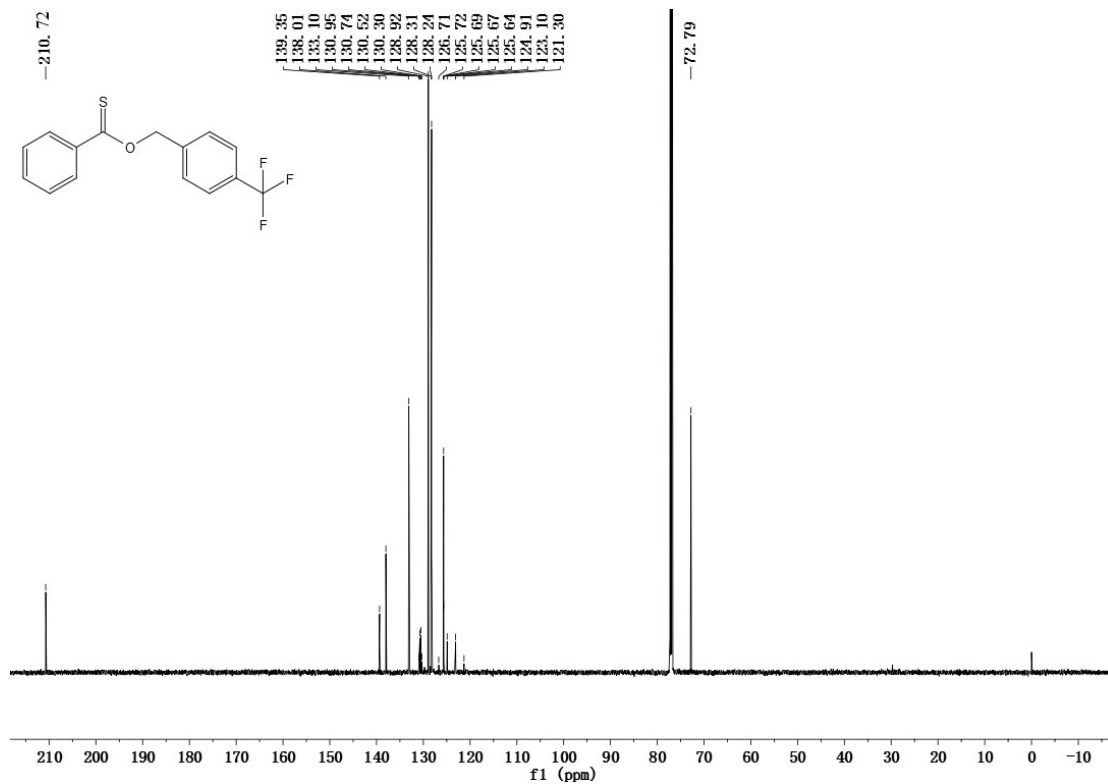

**Figure S38. *O*-(4-(trifluoromethyl)benzyl) benzothioate (3ae)  
Mass spectrum**

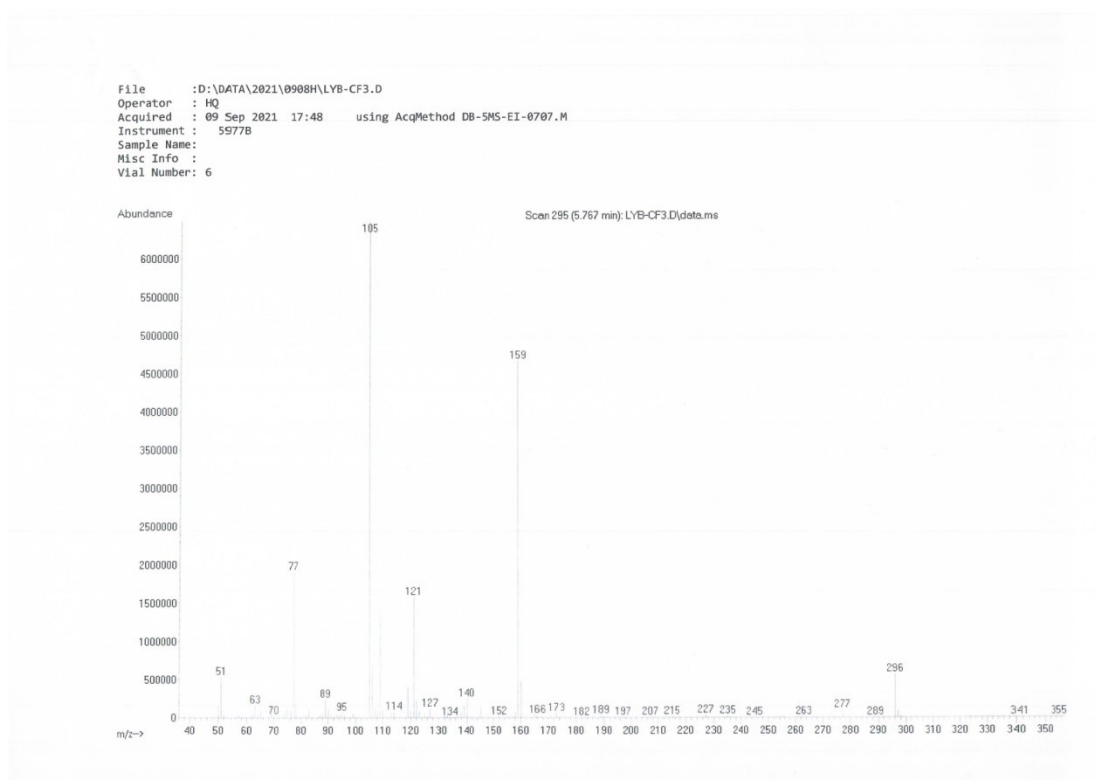

**Figure S39. *O*-(4-(trifluoromethyl)benzyl) benzothioate (3ae)  
HRMS**

National Center for Organic Mass Spectrometry in Shanghai  
Shanghai Institute of Organic Chemistry  
Chinese Academic of Sciences  
High Resolution FI-MS Report  
Low Resolution FI-MS Report

Instrument: JEOL-AccuTOF-GCV46-GCT MS

Operation Mode: FI Positive Ion Mode (Counter Electrode: 10000V)

Card Serial Number: GCT-FI-T21-09-2410

Sample Serial Number: 2019551-LYB-CF3

Operator: Li Date: 2021/09/14

| m/z      | Theo. Mass | Delta (ppm) | RDB equiv. | Composition                                                     |
|----------|------------|-------------|------------|-----------------------------------------------------------------|
| 296.0483 | 296.0479   | 1.22        | 13.0       | C <sub>17</sub> H <sub>9</sub> O <sub>4</sub> F                 |
|          | 296.0478   | 1.76        | 2.0        | C <sub>9</sub> H <sub>10</sub> O <sub>4</sub> F <sub>6</sub>    |
|          | 296.0489   | -1.91       | 5.0        | C <sub>12</sub> H <sub>12</sub> O <sub>2</sub> F <sub>4</sub> S |
|          | 296.0477   | 1.95        | 9.0        | C <sub>15</sub> H <sub>11</sub> O <sub>3</sub> F <sub>3</sub> S |
|          | 296.0493   | -3.43       | 10.5       | C <sub>15</sub> H <sub>7</sub> N <sub>3</sub> F <sub>5</sub>    |

Figure S40. *O*-(4-bromobenzyl) benzothioate (3af)

$^1\text{H}$  NMR (600 MHz,  $\text{CDCl}_3$ )

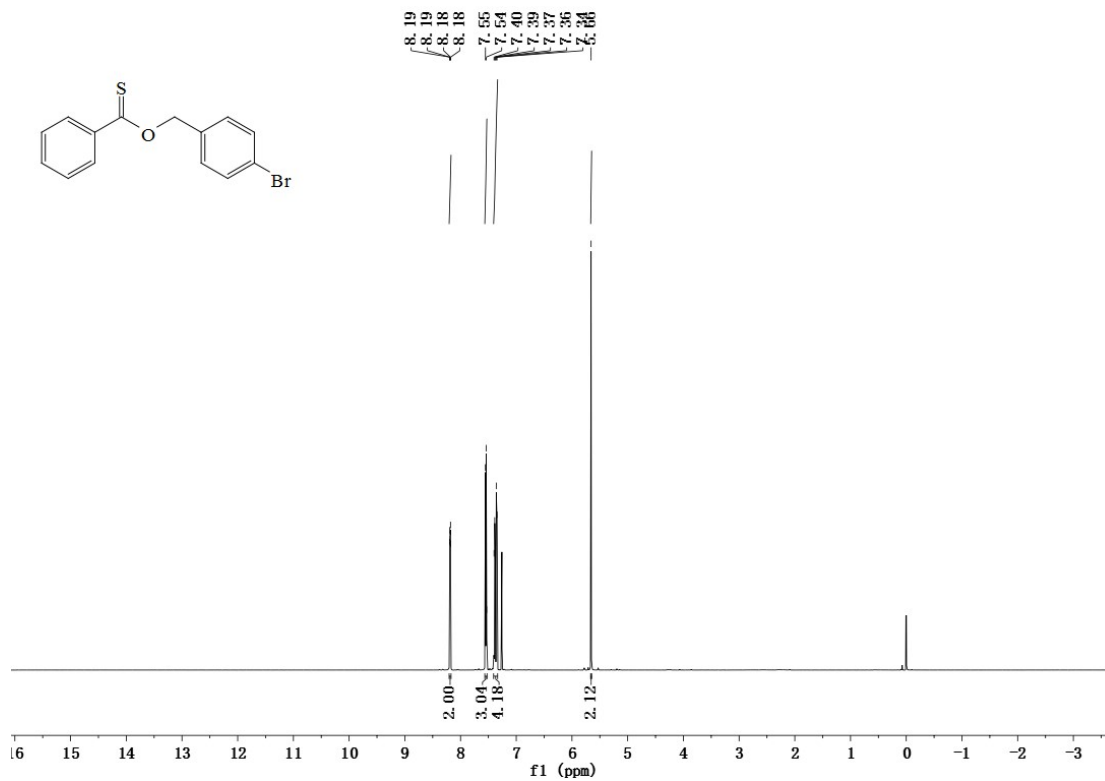

Figure S41. *O*-(4-bromobenzyl) benzothioate (3af)

$^{13}\text{C}$  NMR (150 MHz,  $\text{CDCl}_3$ )

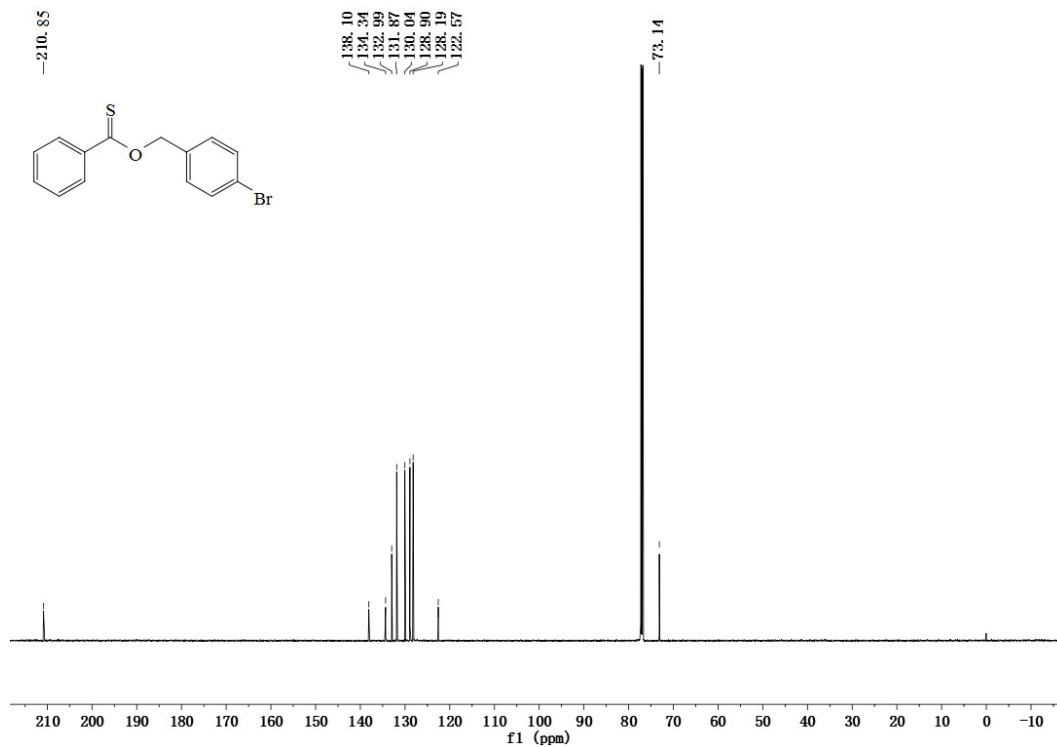

Figure S42. *O*-(4-bromobenzyl) benzothioate (3af)

## Mass spectrum

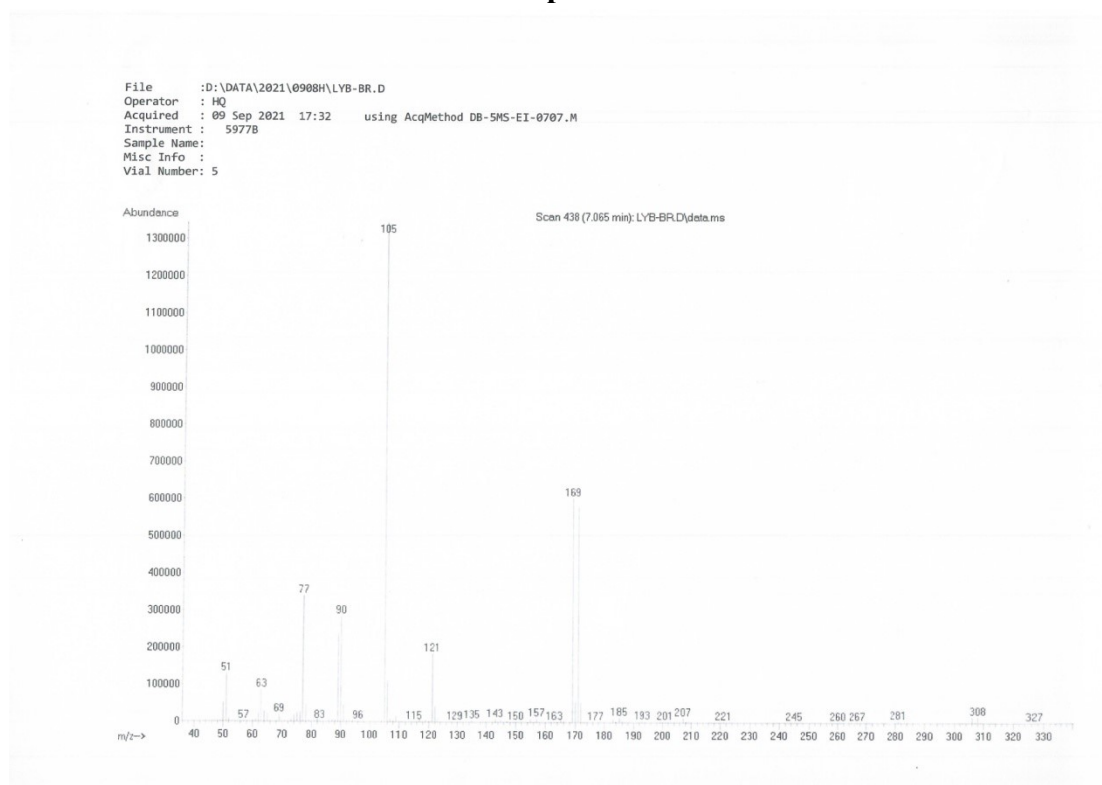

**Figure S43. *O*-(4-bromobenzyl) benzothioate (3af)  
HRMS**

National Center for Organic Mass Spectrometry in Shanghai  
 Shanghai Institute of Organic Chemistry  
 Chinese Academic of Sciences  
 High Resolution FI-MS Report  
 Low Resolution FI-MS Report



---

Instrument: JBOI-AccuTOF-GCv46-GC1 MS  
 Operation Mode: FI Positive Ion Mode (Counter Electrode: 10000V)  
 Card Serial Number: GCT-FI-T21-09-2411  
 Sample Serial Number: 2019551-LYB-Br  
 Operator: Li Date: 2021/09/14

---

| m/z      | Theo. Mass | Delta (ppm) | RDB equiv. | Composition                                                                   |
|----------|------------|-------------|------------|-------------------------------------------------------------------------------|
| 305.9715 | 305.9717   | -0.58       | 9.0        | C <sub>10</sub> H <sub>2</sub> O <sub>3</sub> N <sub>2</sub> F <sub>4</sub> S |
|          | 305.9718   | -1.09       | -6.0       | C <sub>3</sub> H <sub>13</sub> O <sub>2</sub> BrFeS                           |
|          | 305.9720   | -1.61       | 5.0        | C <sub>11</sub> H <sub>12</sub> O <sub>2</sub> BrFS                           |
|          | 305.9709   | 1.94        | 2.0        | C <sub>8</sub> H <sub>10</sub> O <sub>4</sub> BrF <sub>3</sub>                |
|          | 305.9708   | 2.12        | 9.0        | C <sub>14</sub> H <sub>11</sub> OBrS                                          |



Figure S44. *O*-propyl benzothioate (3ag)

<sup>1</sup>H NMR (600 MHz, CDCl<sub>3</sub>)

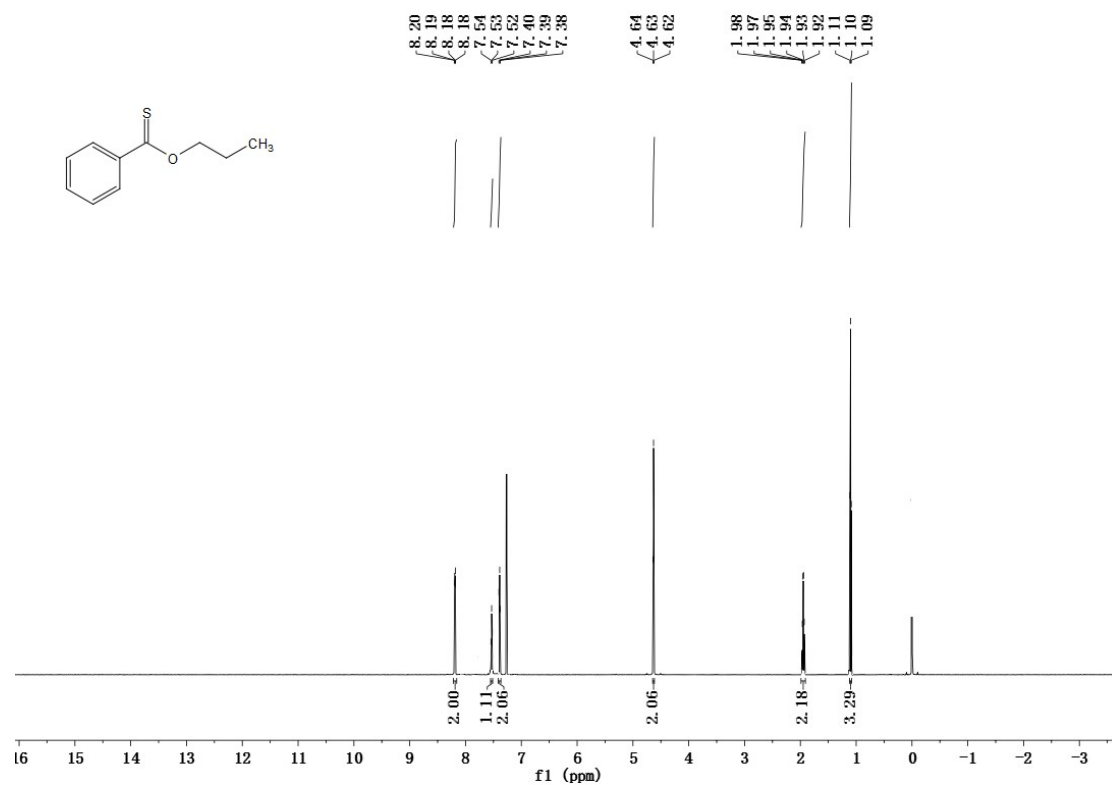

Figure S45. *O*-butyl benzothioate (3ah)

<sup>1</sup>H NMR (600 MHz, CDCl<sub>3</sub>)

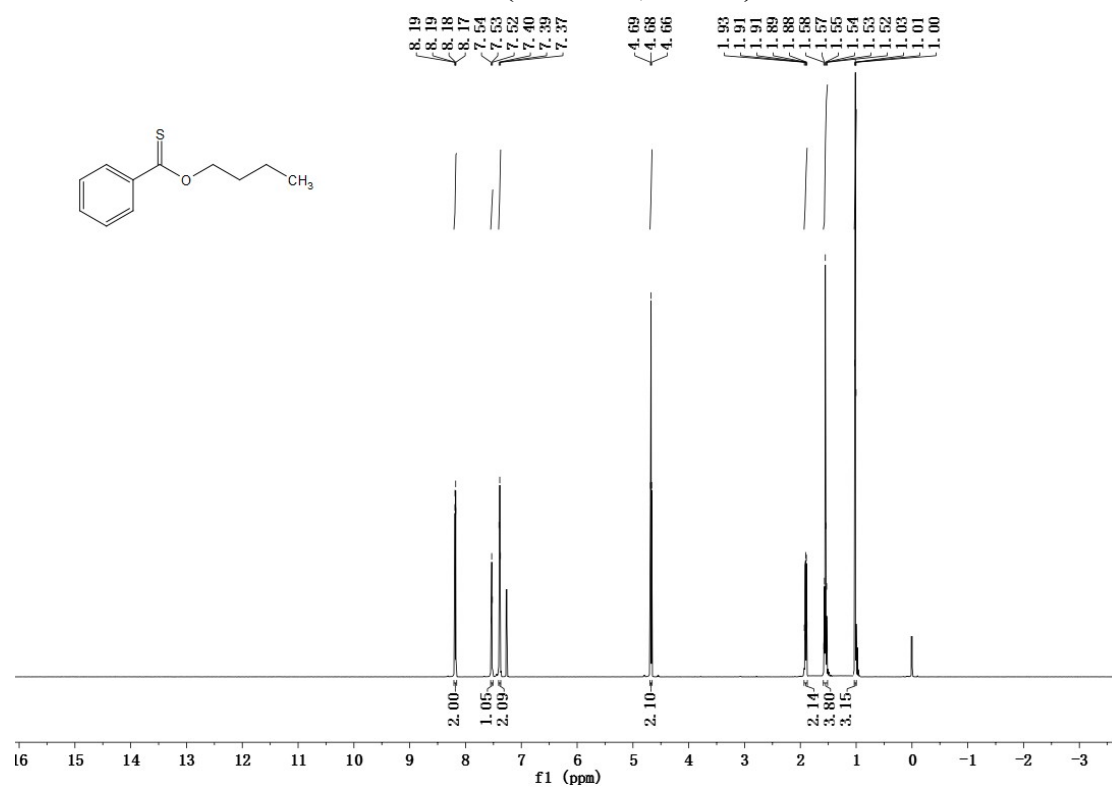

Figure S46. *O*-hexyl benzothioate (3ai)

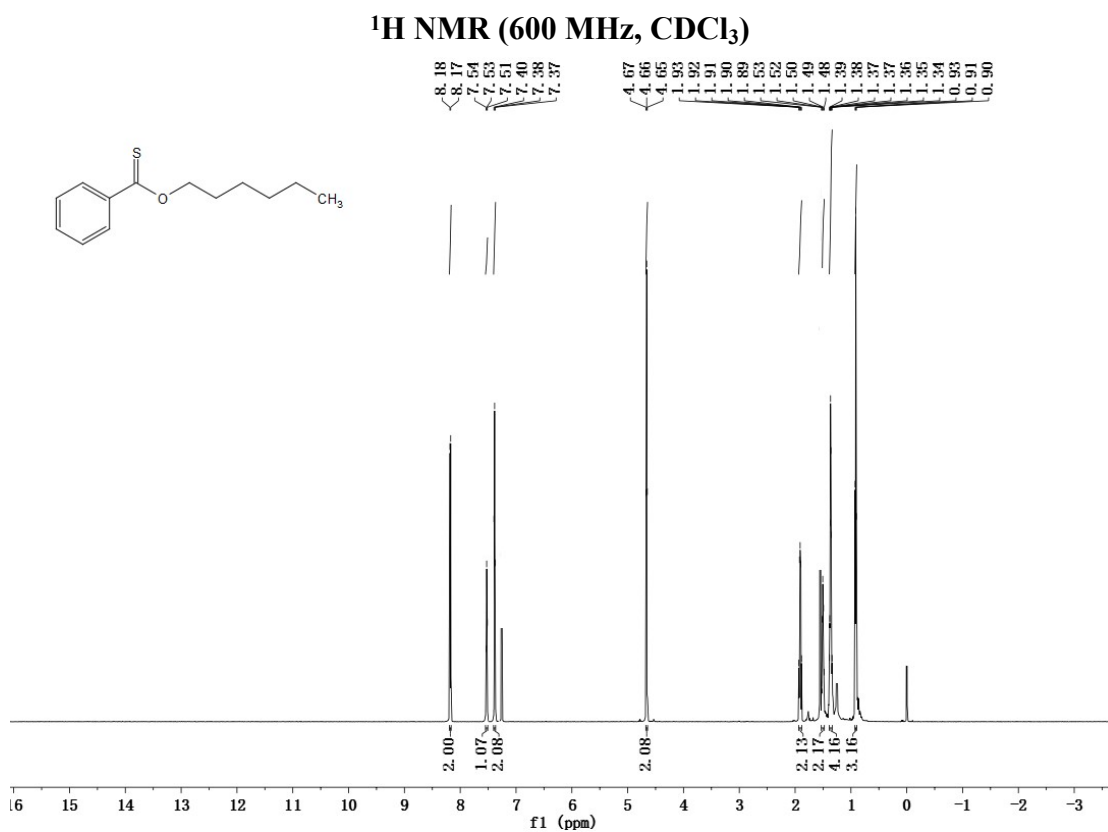

**Figure S47. *O*-(thiophen-2-ylmethyl) benzothioate (3aj)**

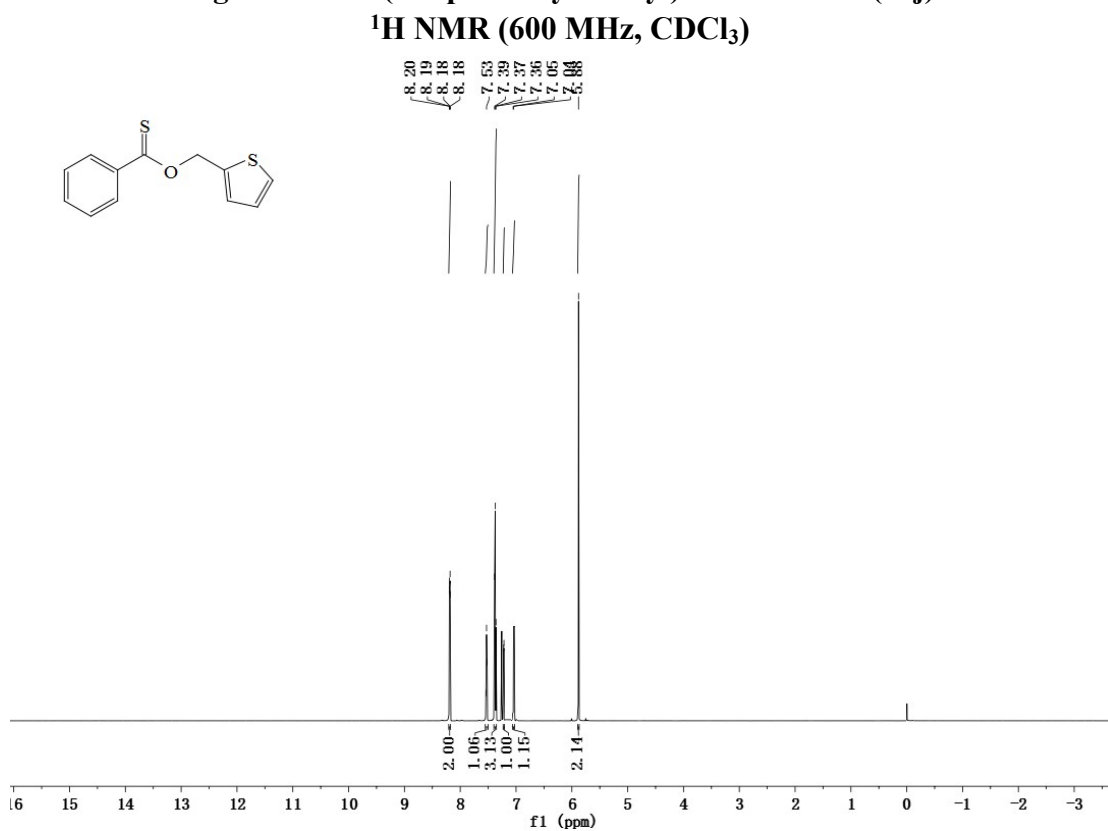

Figure S48. *O*-(thiophen-2-ylmethyl) benzothioate (3aj)  
<sup>13</sup>C NMR (150 MHz, CDCl<sub>3</sub>)

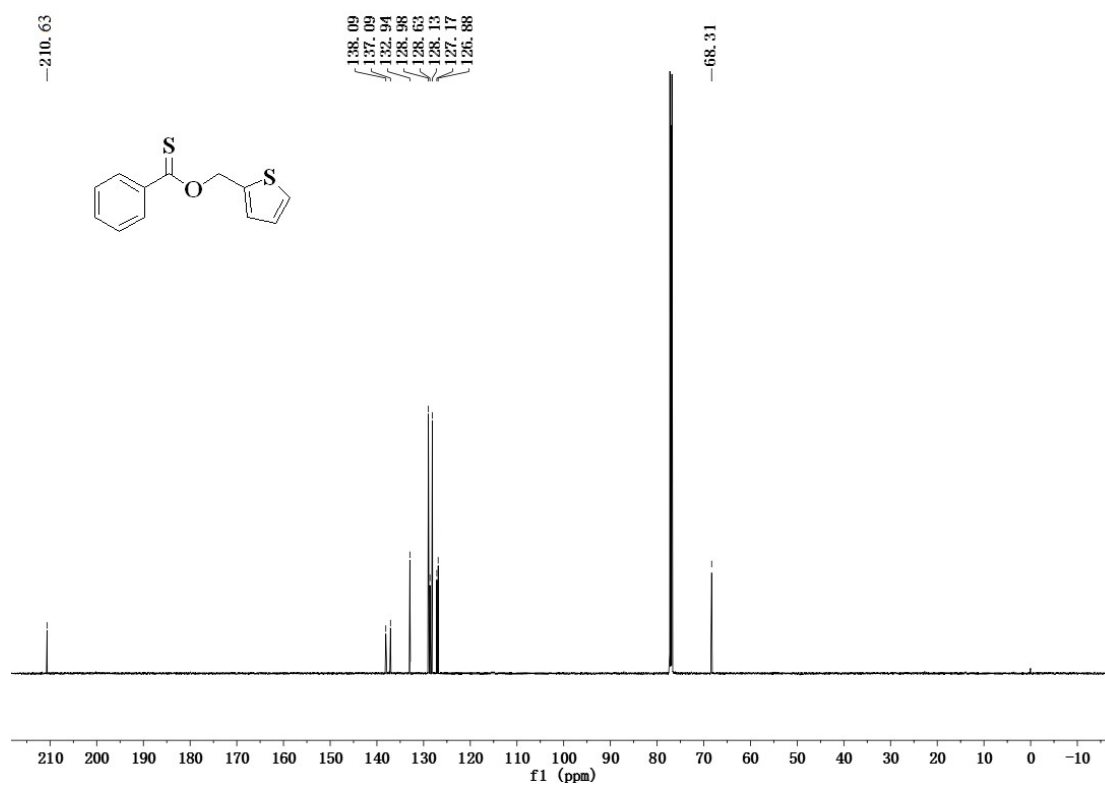

Figure S49. *O*-(thiophen-2-ylmethyl) benzothioate (3aj)  
 Mass spectrum

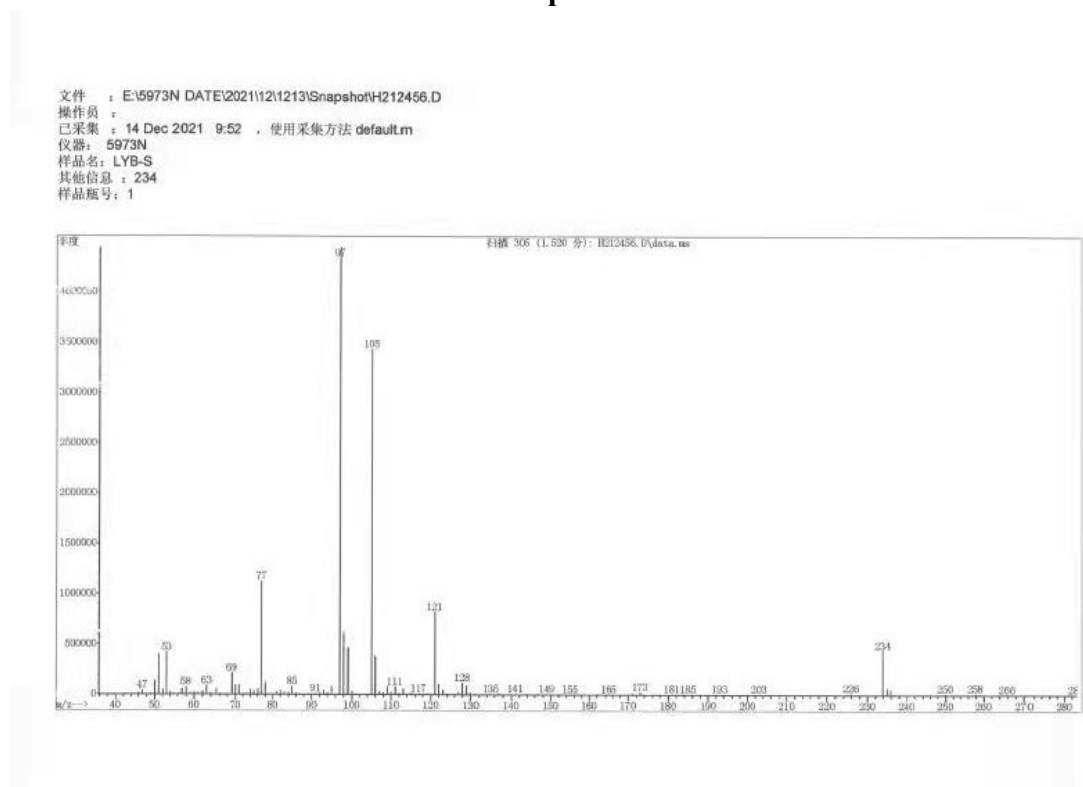

Figure S50. *O*-(thiophen-2-ylmethyl) benzothioate (3aj)

# HRMS

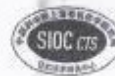

National Center for Organic Mass Spectrometry in Shanghai  
Shanghai Institute of Organic Chemistry  
Chinese Academic of Sciences  
High Resolution FI-MS Report  
Low Resolution FI-MS Report

|                       |                           |                    |            |
|-----------------------|---------------------------|--------------------|------------|
| Instrument:           | JEOL-AccuTOF-GCV4G-GCT MS |                    |            |
| Operation Mode:       | FI Positive Ion Mode      | Counter Electrode: | 10000V     |
| Card Serial Number:   | GCT-FI-T21-12-3080        |                    |            |
| Sample Serial Number: | 2019551-LYB-S             |                    |            |
| Operator:             | Li                        | Date:              | 2021/12/16 |

| m/z      | Theo. Mass | Delta (ppm) | RDB equiv. | Composition                                                   |
|----------|------------|-------------|------------|---------------------------------------------------------------|
| 234.0169 | 234.0168   | 0.36        | 1.0        | C <sub>8</sub> H <sub>9</sub> O <sub>4</sub> F <sub>3</sub> S |
|          | 234.0168   | 0.61        | 8.0        | C <sub>12</sub> H <sub>10</sub> OS <sub>2</sub>               |
|          | 234.0166   | 1.29        | -3.0       | C <sub>4</sub> H <sub>11</sub> OP <sub>2</sub> S <sub>2</sub> |
|          | 234.0173   | -1.57       | 6.5        | C <sub>9</sub> H <sub>4</sub> O <sub>2</sub> NF <sub>4</sub>  |
|          | 234.0161   | 3.31        | 10.5       | C <sub>12</sub> H <sub>3</sub> ONF <sub>3</sub>               |

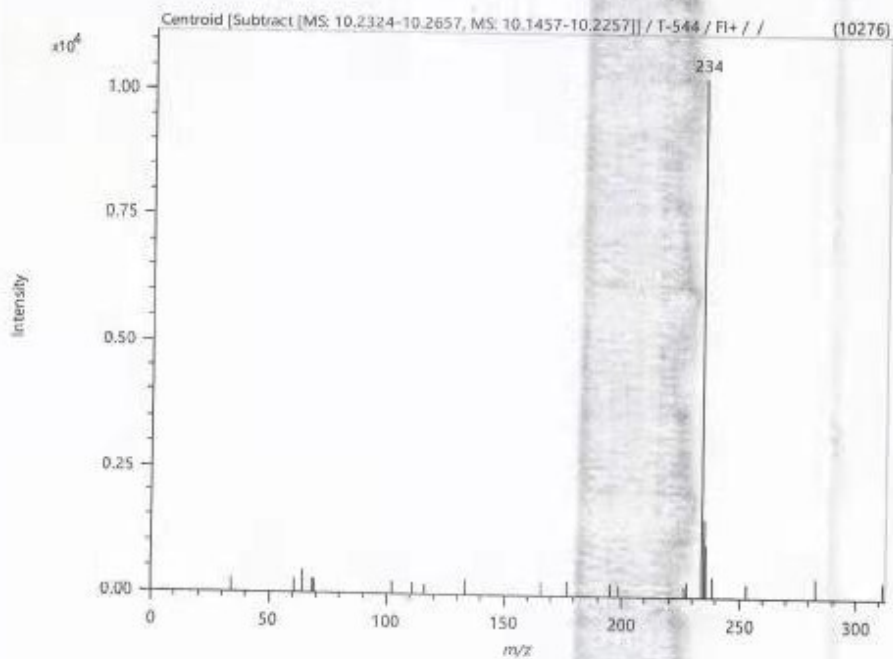

Figure S51. *O*-benzyl 4-methylbenzothioate (3ba)  
<sup>1</sup>H NMR (600 MHz, CDCl<sub>3</sub>)

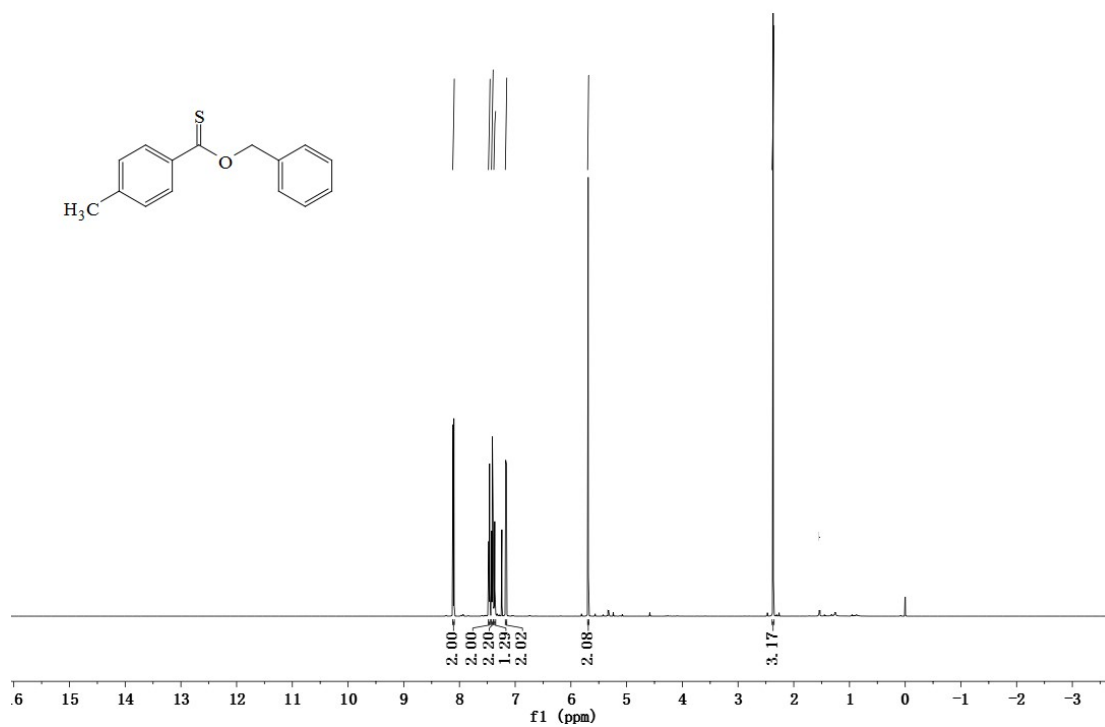

Figure S52. *O*-benzyl 4-methylbenzothioate (3ba)  
<sup>13</sup>C NMR (150 MHz, CDCl<sub>3</sub>)

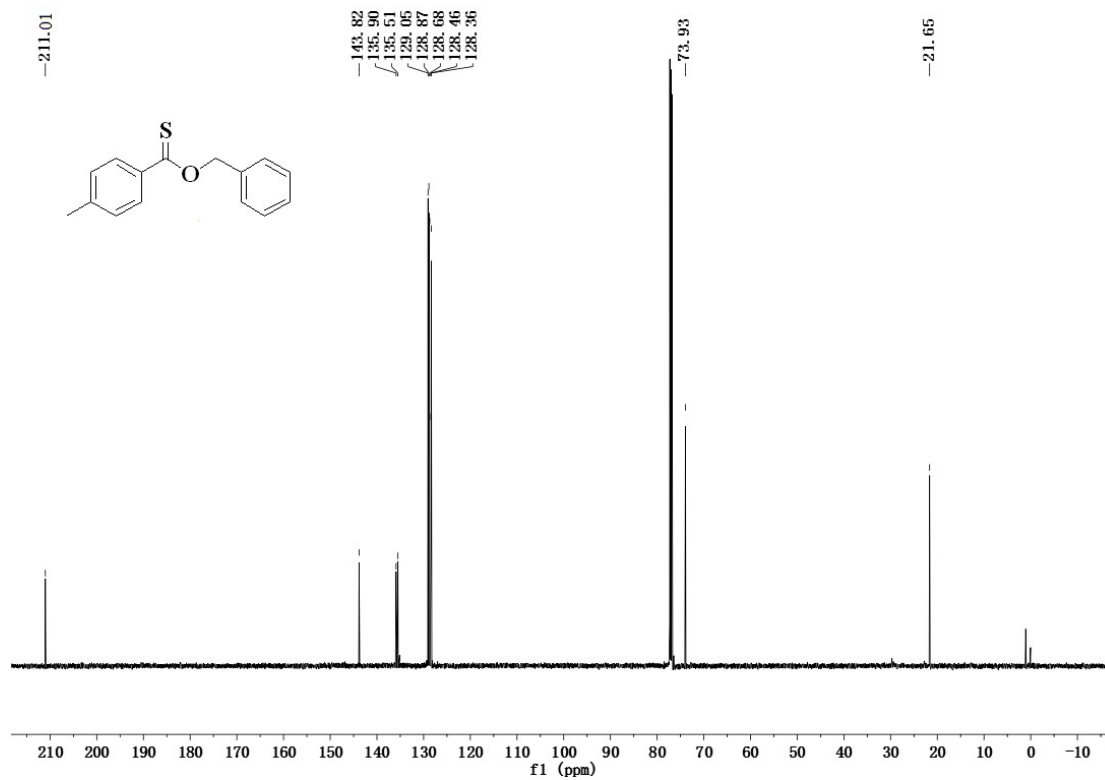

Figure S53. *O*-benzyl 4-methylbenzothioate (3ba)

## Mass spectrum

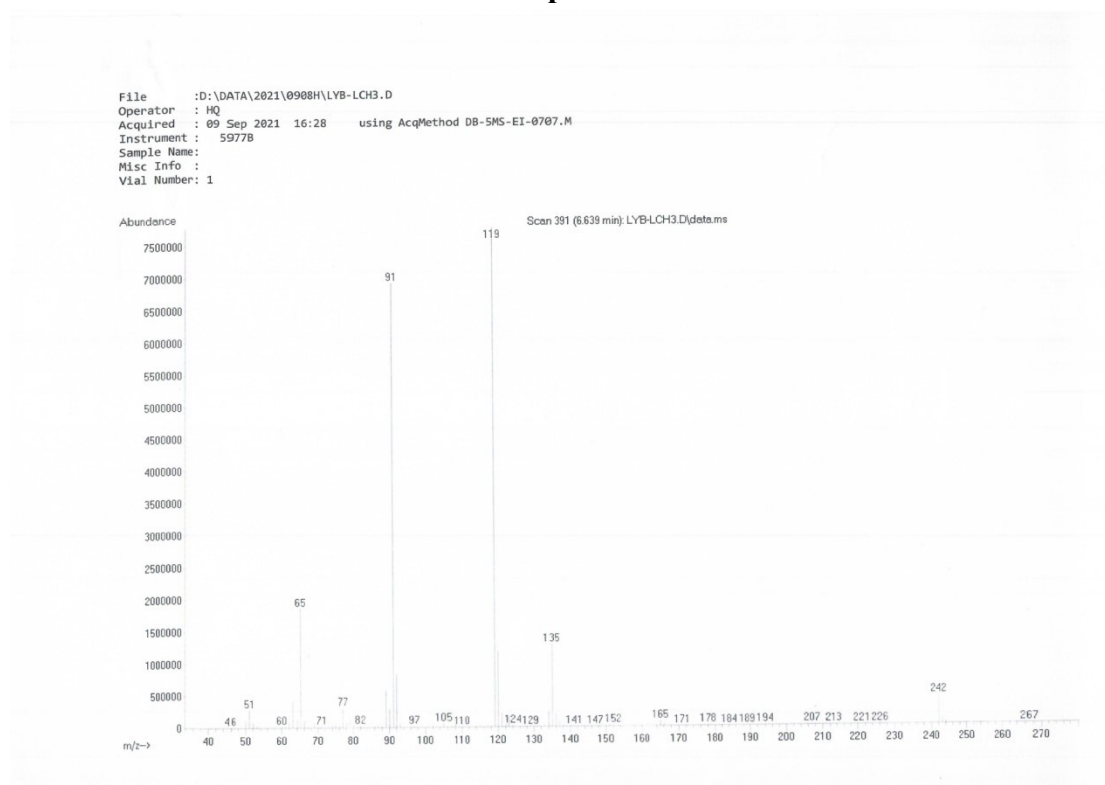

**Figure S54. *O*-benzyl 4-methylbenzothioate (3ba)  
HRMS**

National Center for Organic Mass Spectrometry in Shanghai  
 Shanghai Institute of Organic Chemistry  
 Chinese Academic of Sciences  
 High Resolution FI-MS Report  
 Low Resolution FI-MS Report




---

Instrument: JEOL-AccuTOF-GCv4G-GCT MS

Operation Mode: FI Positive Ion Mode (Counter Electrode: 10000V)

Card Serial Number: GCT-FI-T21-09-2409

Sample Serial Number: 2019551-LYB-LCH3

Operator: Li Date: 2021/09/14

---

| m/z      | Theo. Mass | Delta (ppm) | RDB equiv. | Composition                                                    |
|----------|------------|-------------|------------|----------------------------------------------------------------|
| 242.0761 | 242.0760   | 0.23        | 2.0        | C <sub>9</sub> H <sub>13</sub> O <sub>4</sub> F <sub>3</sub>   |
|          | 242.0760   | 0.47        | 9.0        | C <sub>15</sub> H <sub>14</sub> OS                             |
|          | 242.0758   | 1.12        | -2.0       | C <sub>7</sub> H <sub>15</sub> OF <sub>3</sub> S               |
|          | 242.0770   | -3.60       | -6.0       | C <sub>4</sub> H <sub>16</sub> O <sub>2</sub> F <sub>6</sub> S |
|          | 242.0771   | -4.26       | 5.0        | C <sub>12</sub> H <sub>15</sub> O <sub>2</sub> FS              |

**Figure S55. *O*-benzyl 4-methoxybenzothioate (3ca)**

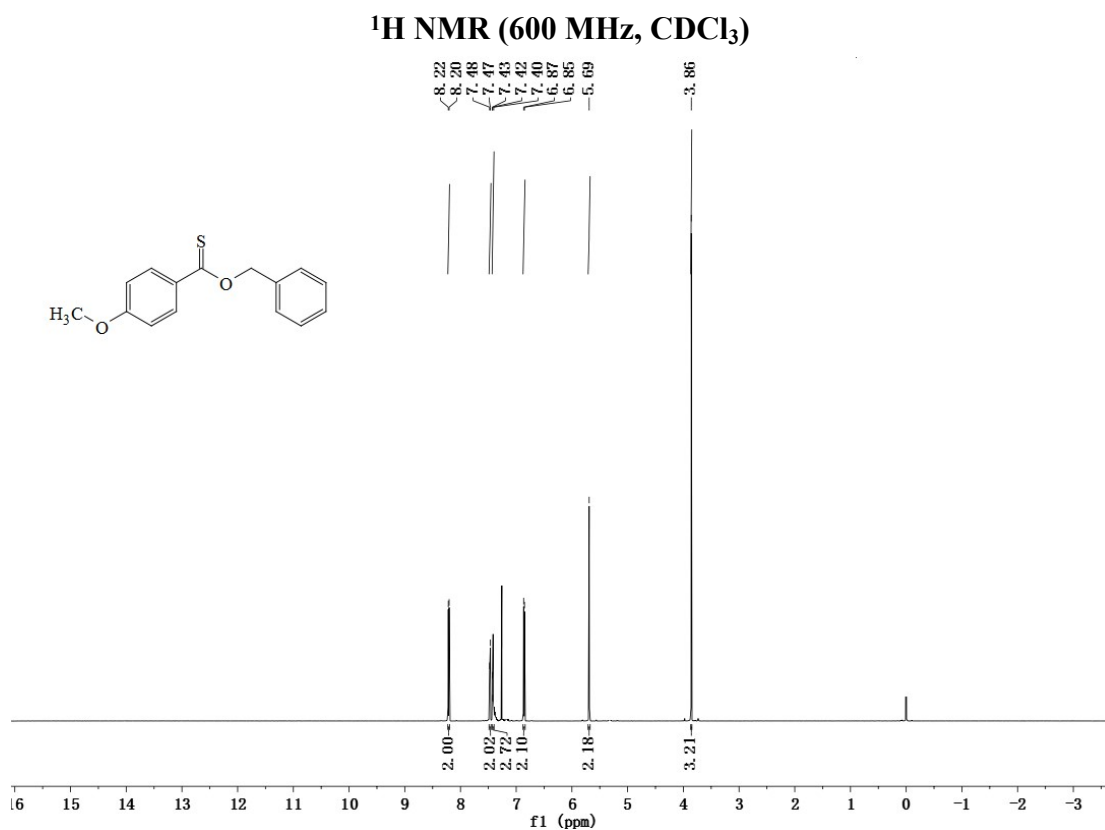

**Figure S56. *O*-benzyl 4-methoxybenzothioate (3ca)**

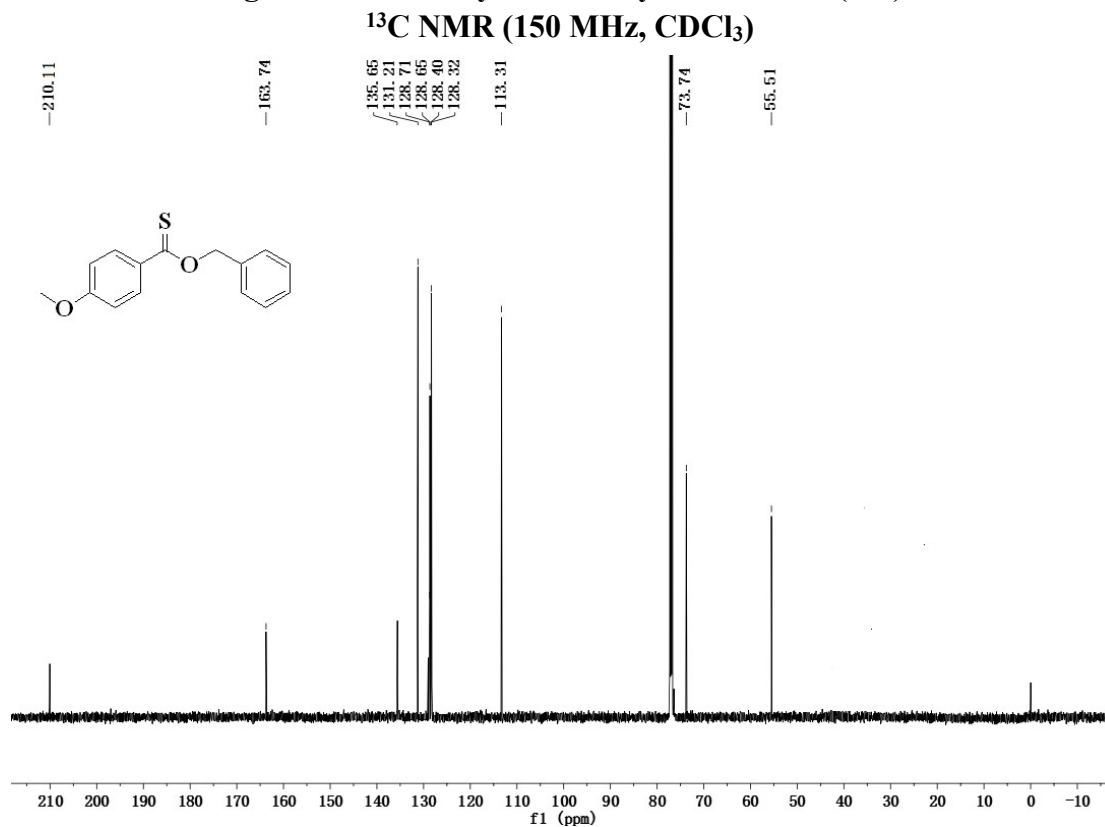

**Figure S57. *O*-benzyl 4-methoxybenzothioate (3ca)**

## Mass spectrum

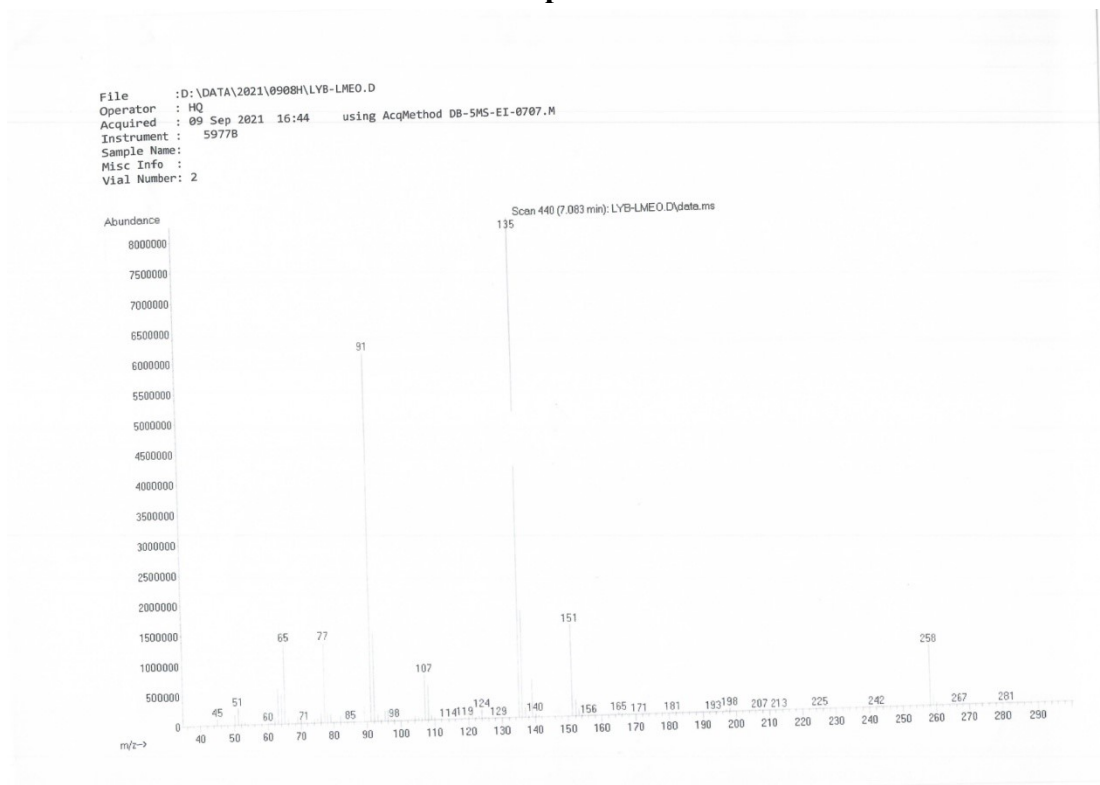

**Figure S58. *O*-benzyl 4-methoxybenzothioate (3ca)  
HRMS**

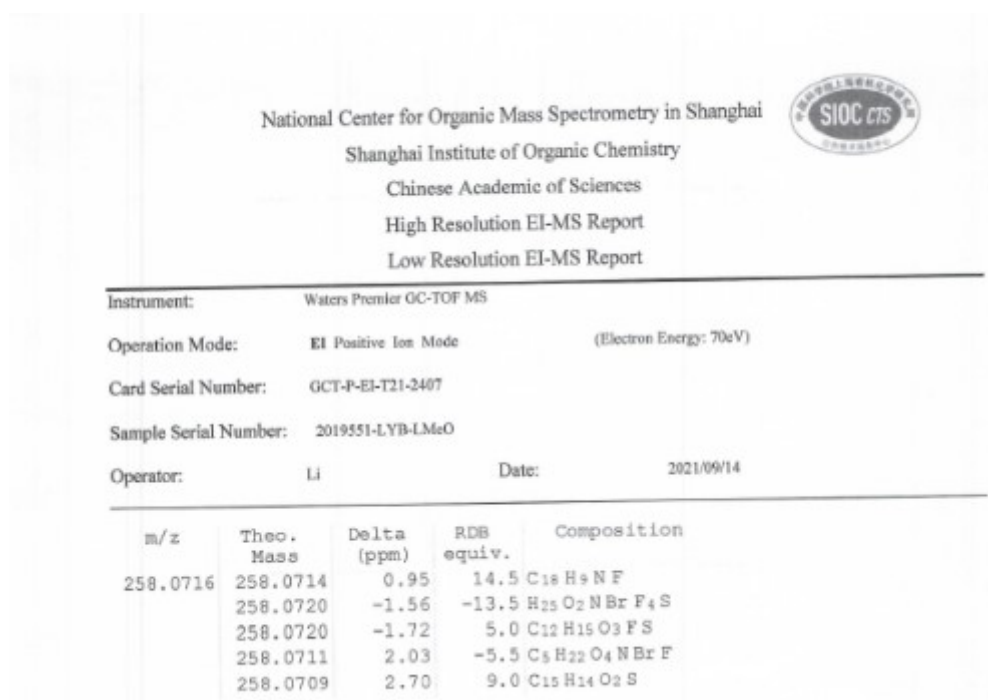



Figure S59. *O*-benzyl 4-fluorobenzothioate (3da)  
<sup>1</sup>H NMR (600 MHz, CDCl<sub>3</sub>)

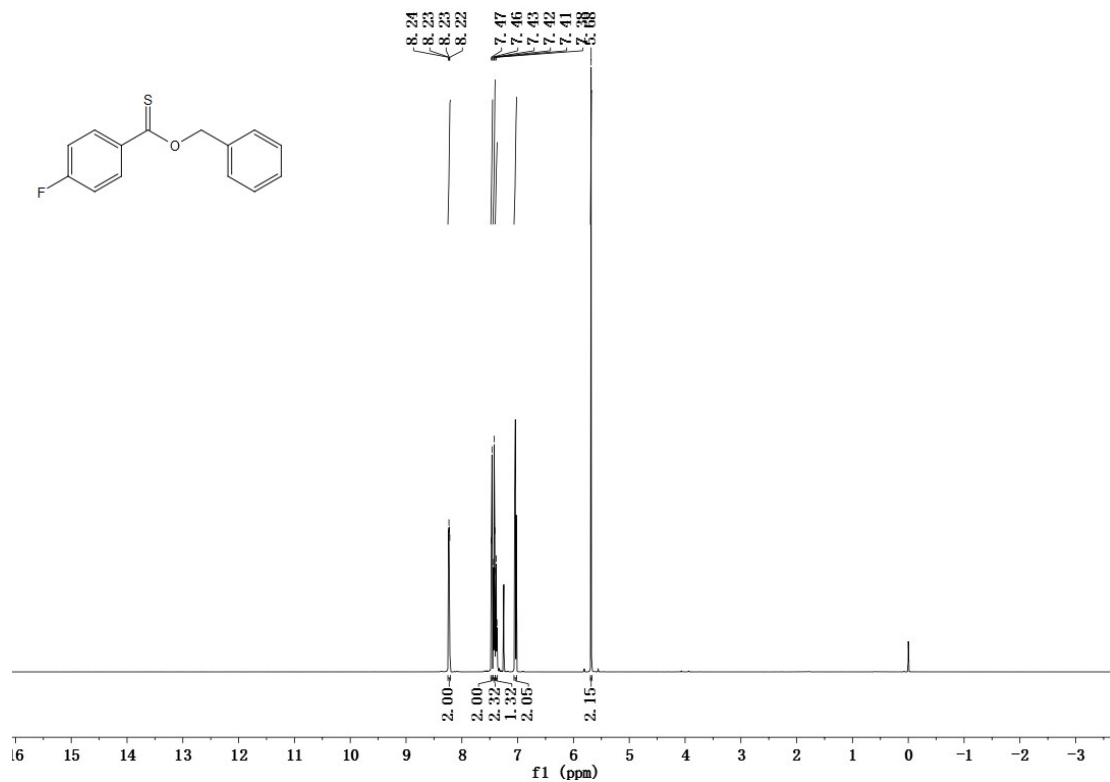

Figure S60. *O*-benzyl 4-fluorobenzothioate (3da)  
<sup>19</sup>F NMR (565 MHz, CDCl<sub>3</sub>)

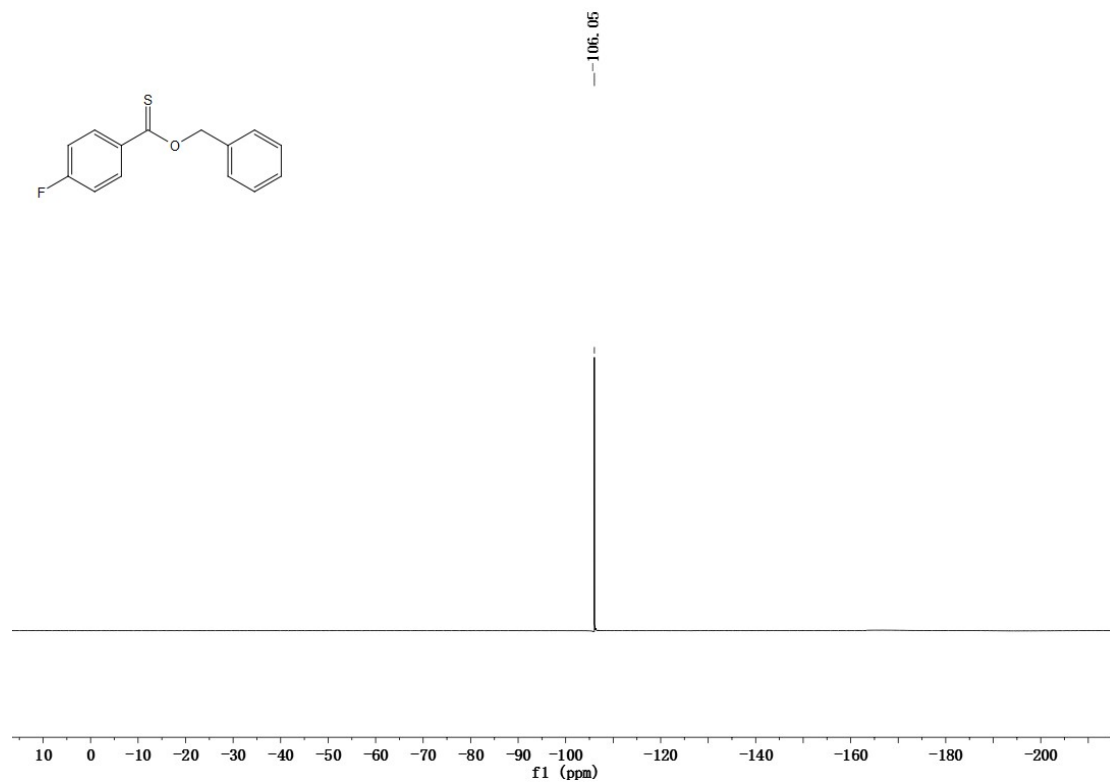

Supplement: d1ob02349g1.pdf [file d1ob02349g1.pdf]
